# Supplementary material for: Benefits and Harms of Edible Vegetable Oils and Fats Fortified with Vitamins A and D as a Public Health Intervention in the General Population: A Systematic Review of Interventions
Source: MDPI journal article supplement (doi:10.3390/nu15245135), 2023-12-18

## Supplementary file S5: Effect of Vitamin A fortified versus non-fortified oils and fats

### Analysis 1.1 Vitamin A fortified versus non-fortified oils and fats. Outcome: Serum retinol ( $\mu\text{mol/L}$ )

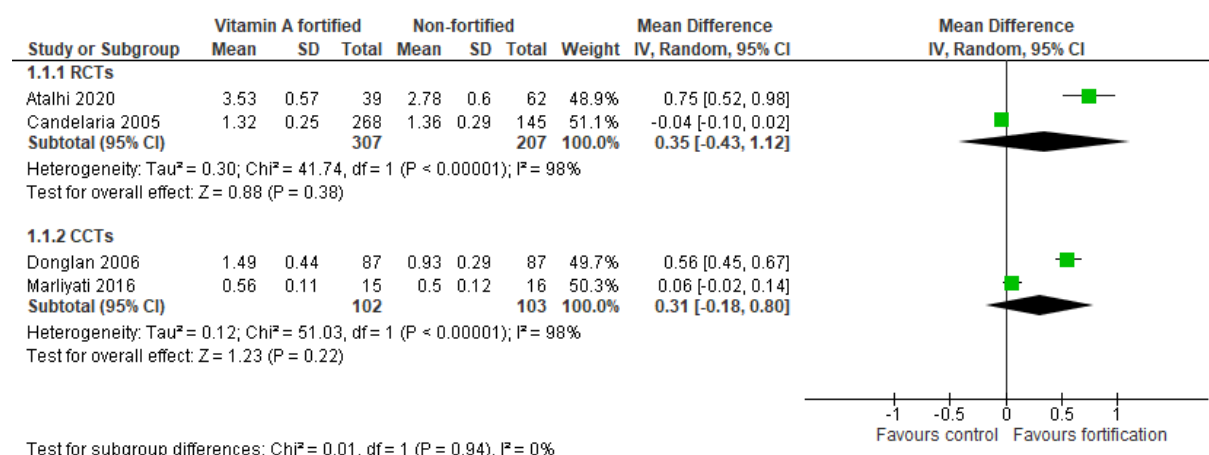

### Analysis 1.2. Vitamin A fortified versus non-fortified oils and fats. Outcome: Serum retinol by age and physiological condition of the population

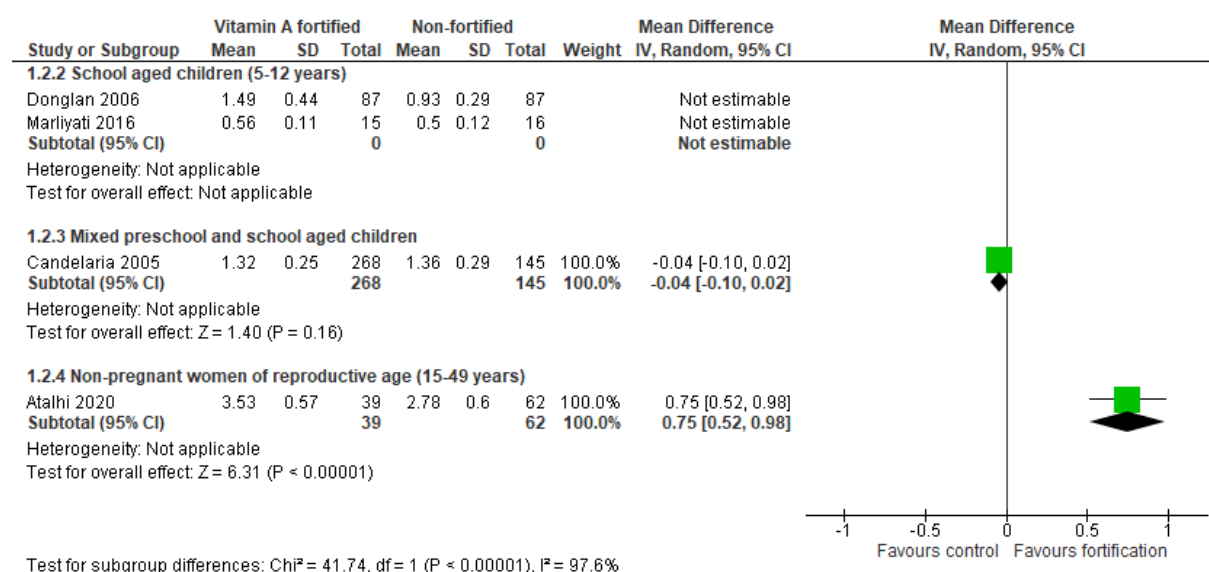

**Analysis 1.3. Vitamin A fortified versus non-fortified oils and fats. Outcome: Serum retinol by vitamin A intake in the population (as defined by inadequate vitamin A intakes by trialists)**

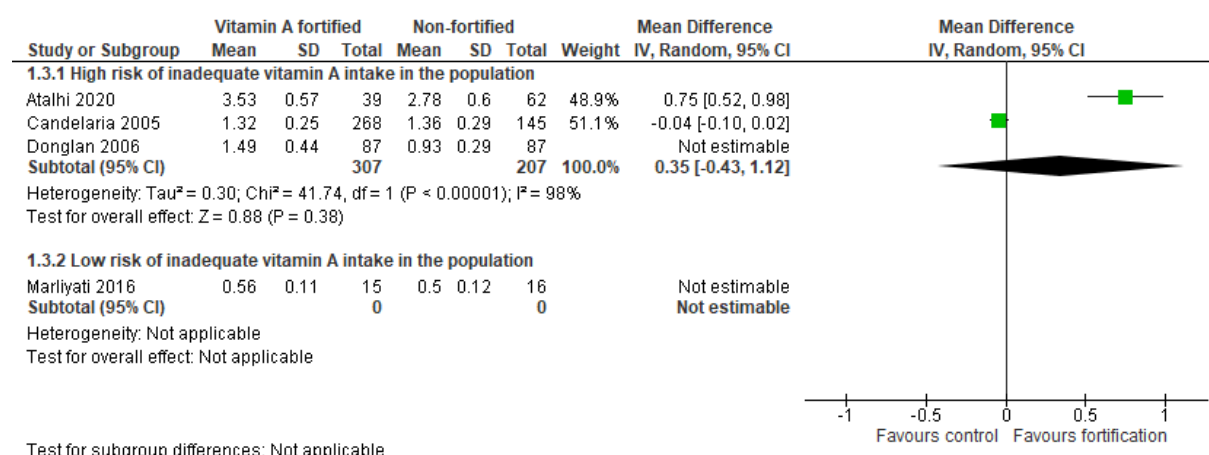

**Analysis 1.4. Vitamin A fortified versus non-fortified oils and fats. Outcome: Serum retinol by public health significance**

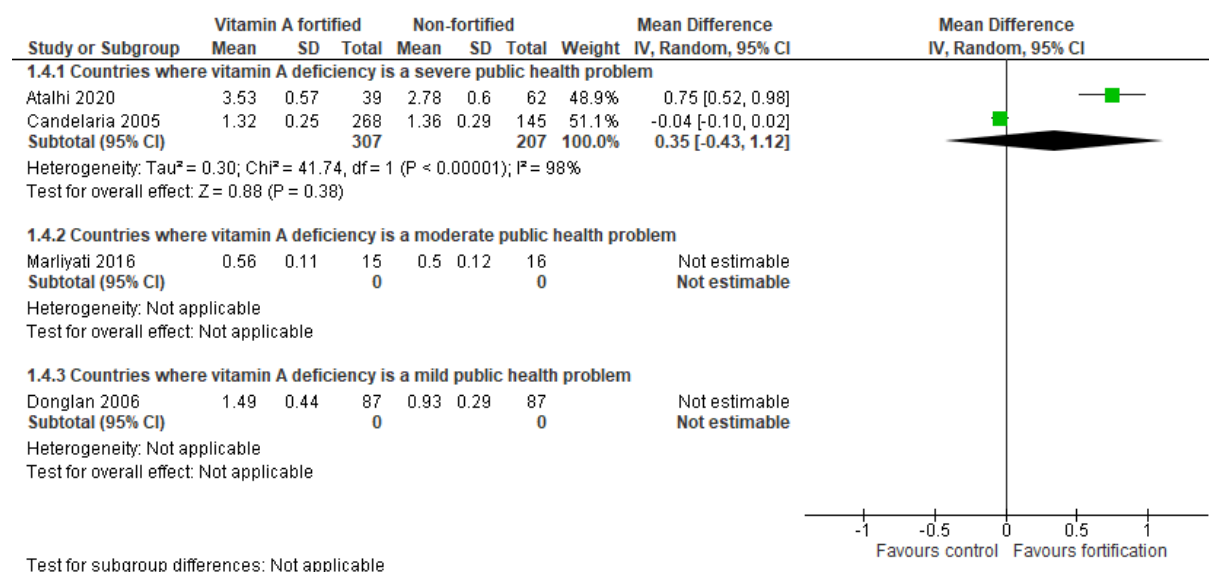

### Analysis 1.5. Vitamin A fortified versus non-fortified oils and fats. Outcome: Serum retinol by exposure to additional vitamin A programmes

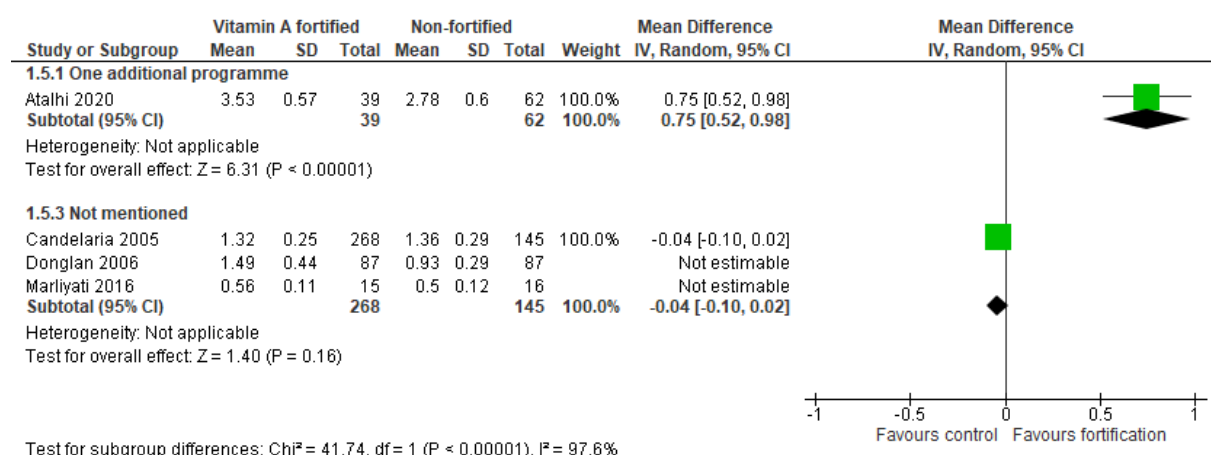

### Analysis 1.6. Vitamin A fortified versus non-fortified oils and fats. Outcome: Serum retinol by vehicle of the intervention (oils or fats)

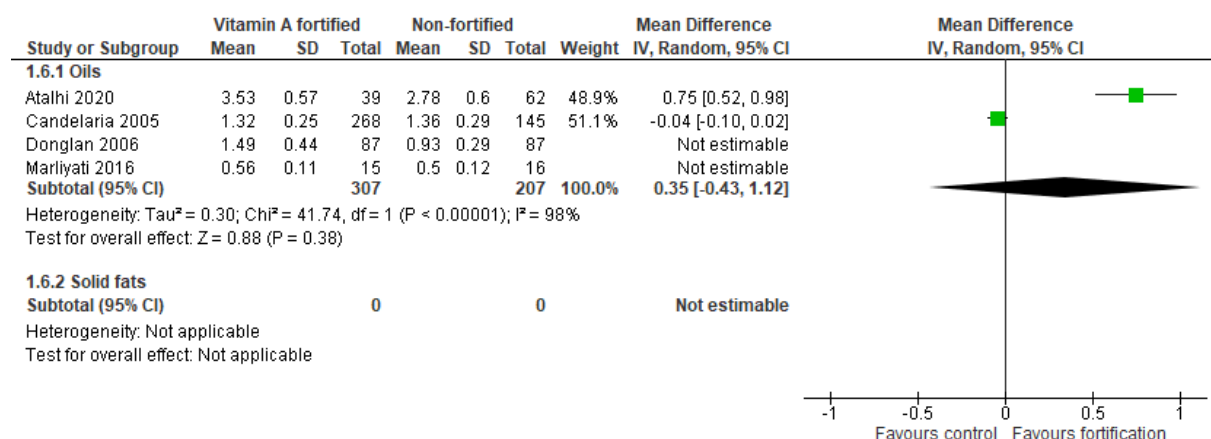

### Analysis 1.7. Vitamin A fortified versus non-fortified oils and fats. Outcome: Serum retinol by consumption patterns

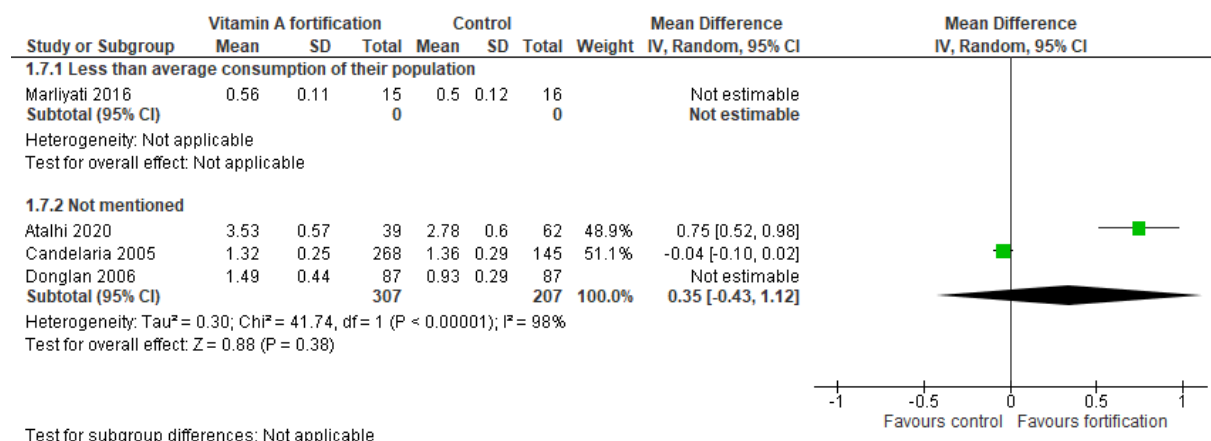

### Analysis 1.8. Vitamin A fortified versus non-fortified oils and fats. Outcome: Serum retinol by intervention duration

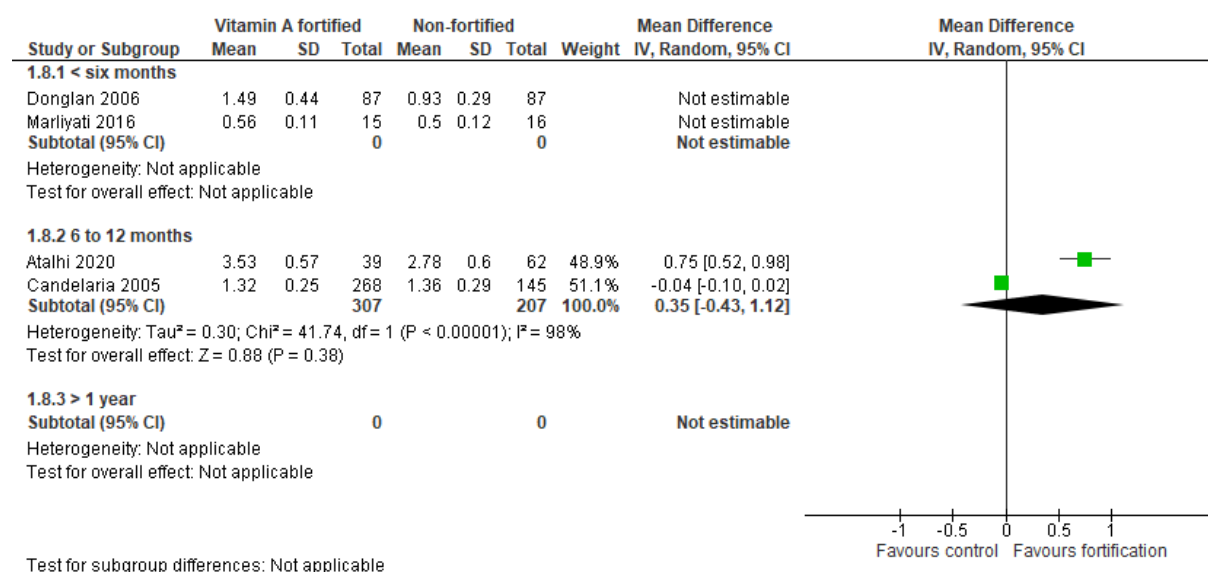

### Analysis 1.9. Serum retinol by amount of vitamin A added through fortification

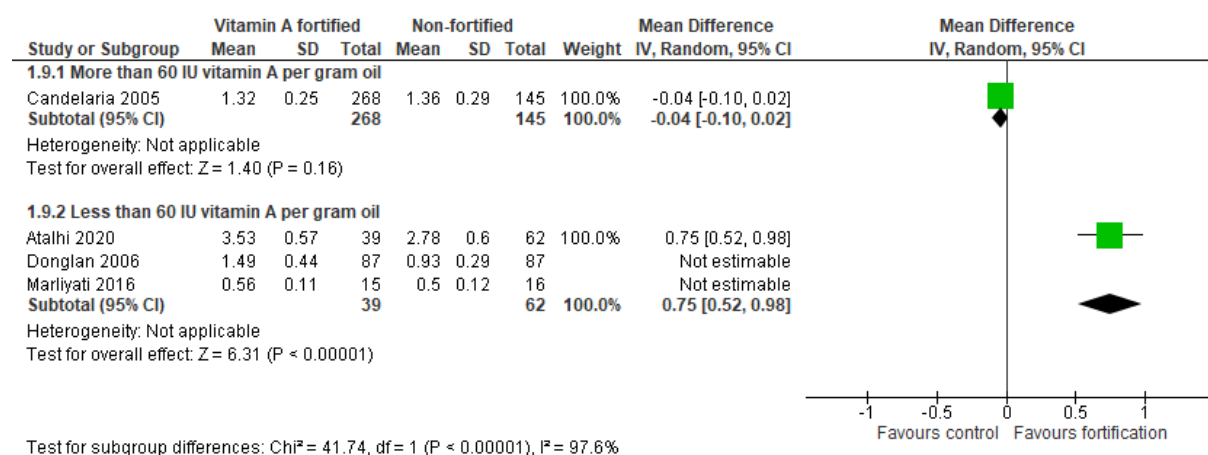

### Analysis 1.10. Vitamin A fortified versus non-fortified oils and fats. Outcome: Serum retinol by type of vitamin A compound

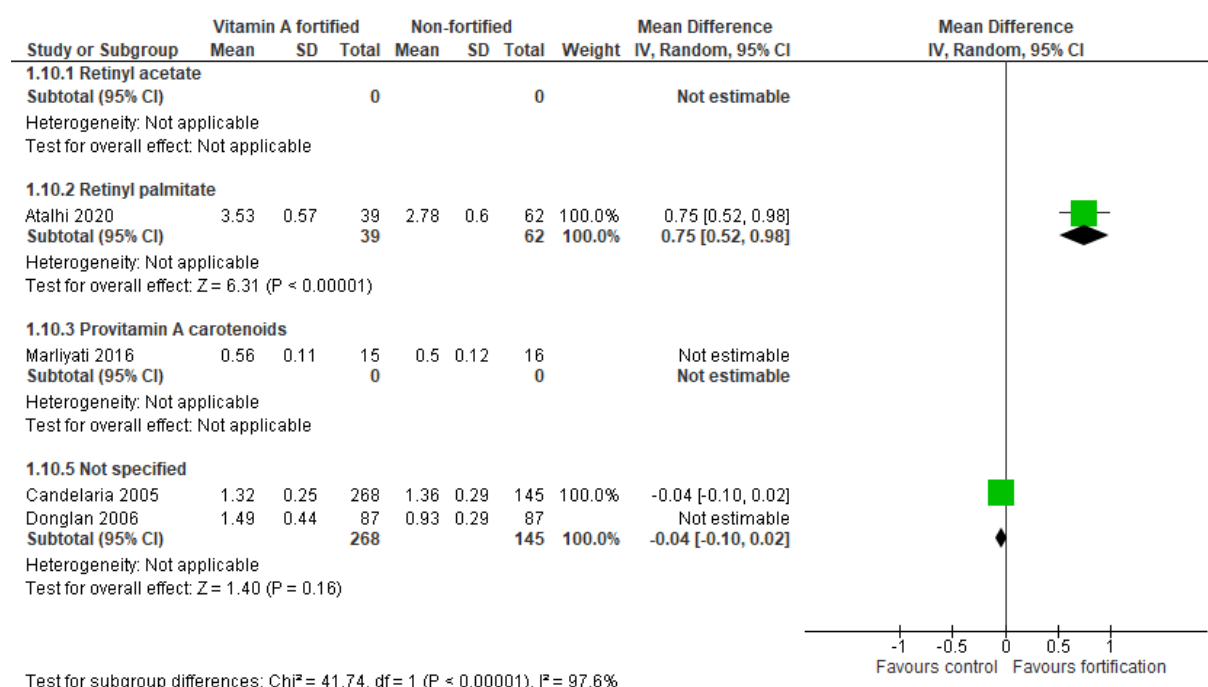

### Analysis 1.11. Vitamin A fortified versus non-fortified oils and fats. Outcome: Serum retinol by type of vitamin A fortification intervention

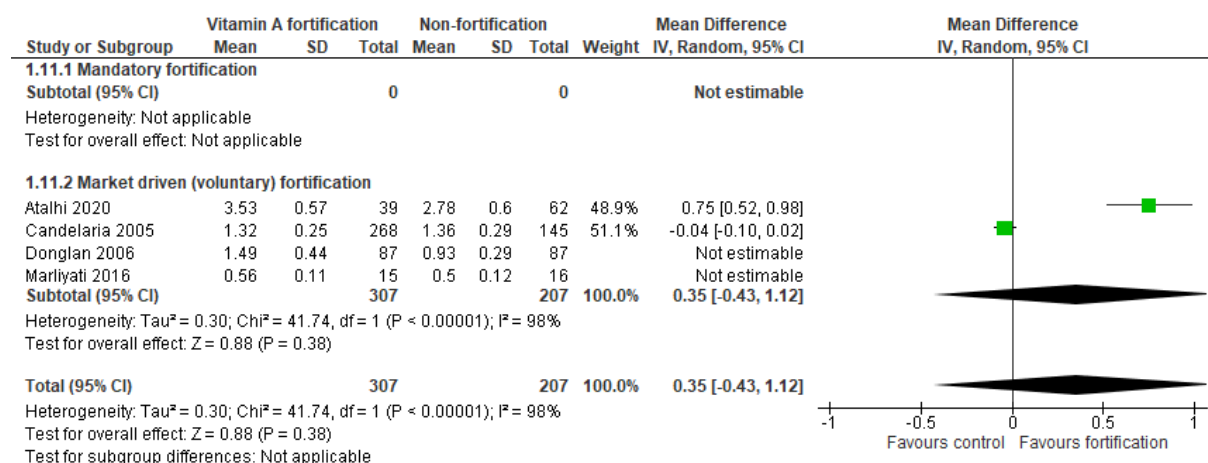

### Analysis 1.12. Vitamin A fortified versus non-fortified oils and fats. Outcome: Serum retinol by method of cooking

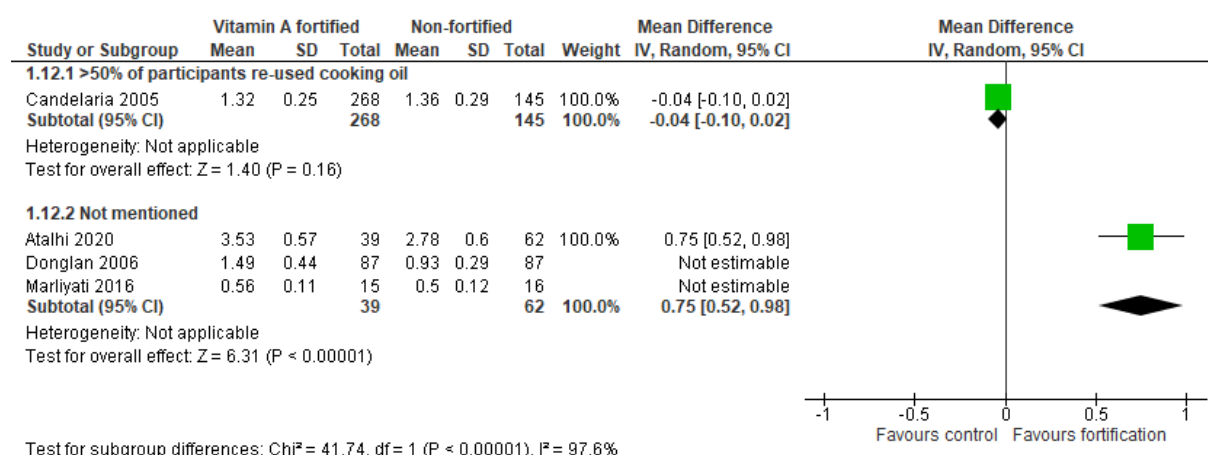

### Analysis 1.13. Vitamin A fortified versus non-fortified oils and fats. Outcome: Serum retinol by delivery platform

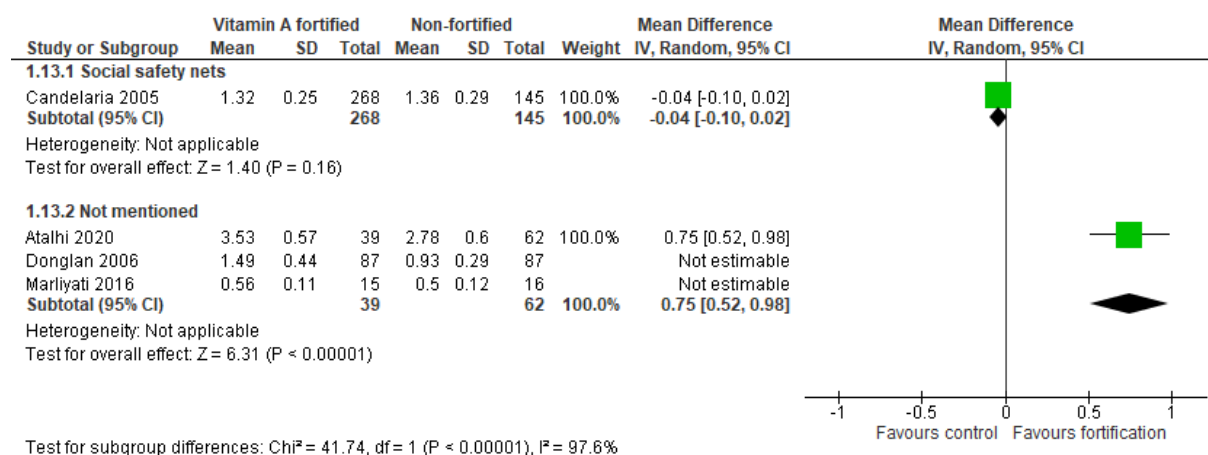

### Analysis 1.14. Vitamin A fortified versus non-fortified oils and fats. Outcome: Subclinical vitamin A deficiency (serum retinol ≤ 0.70 µmol/L)

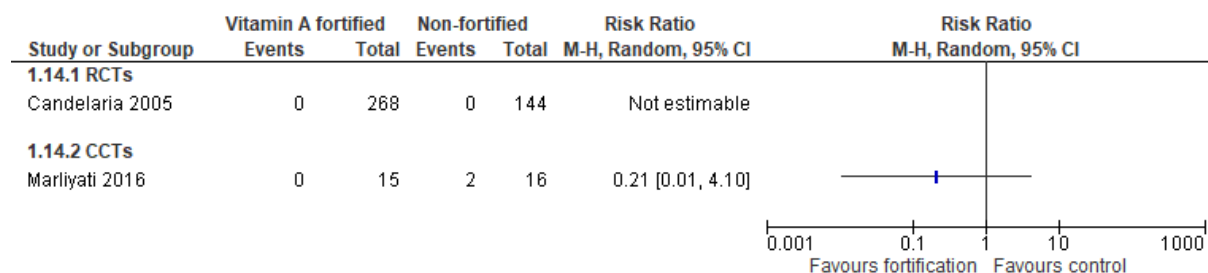

### Analysis 1.15. Vitamin A fortified versus non-fortified oils and fats. Outcome: Dietary vitamin A intake

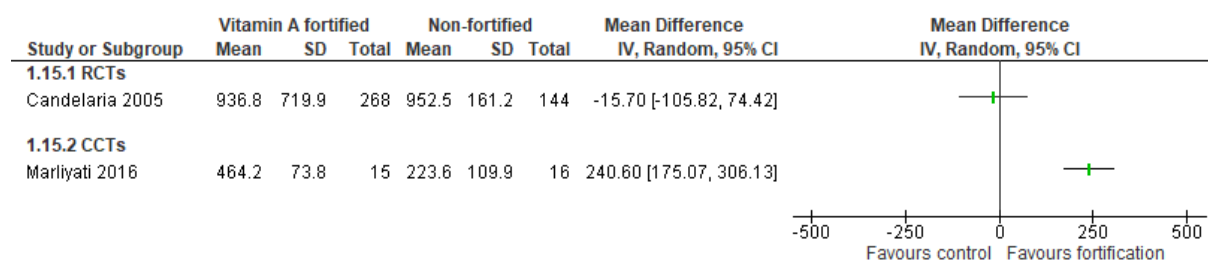

### Analysis 1.16. Vitamin A fortified versus non-fortified oils and fats. Outcome: Retinol in breast milk ( $\mu\text{mol/L}$ )

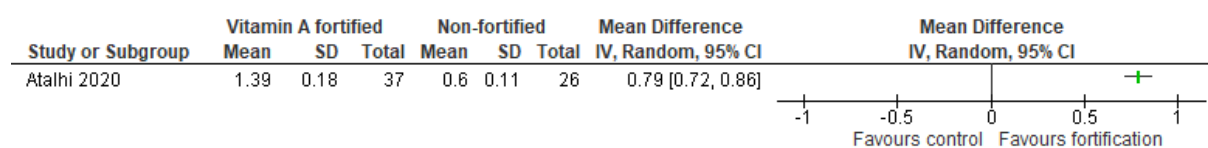

### Analysis 1.17. Vitamin A fortified versus non-fortified oils and fats. Outcome: Mothers with low concentrations of retinol in breast milk ( $<1.05 \mu\text{mol/L}$ )

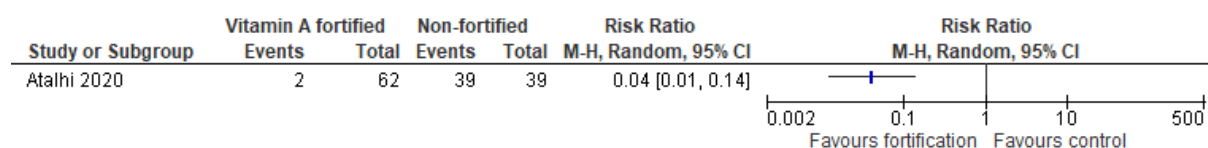

### Analysis 1.18. Vitamin A fortified versus non-fortified oils and fats. Outcome: BMI ( $\text{kg/m}^2$ )

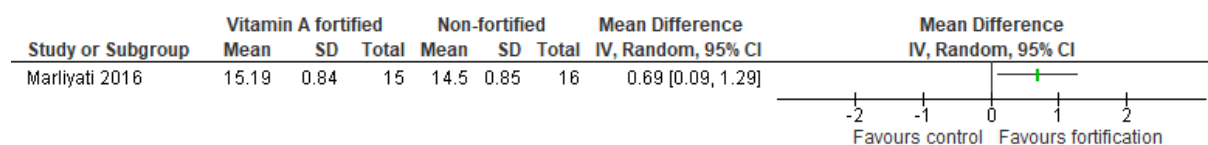

### Analysis 1.19. Vitamin A fortified versus non-fortified oils and fats. Outcome: Weight-for-height z-scores

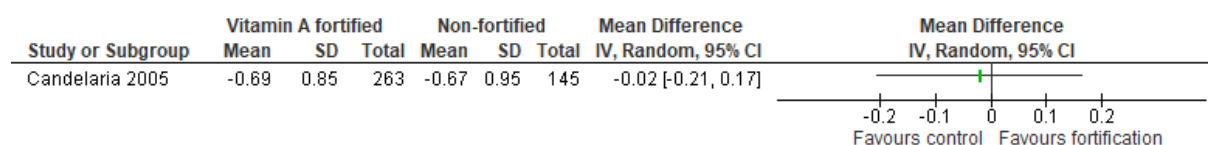

### Analysis 1.20. Vitamin A fortified versus non-fortified oils and fats. Outcome: IgG levels (µmol/L)

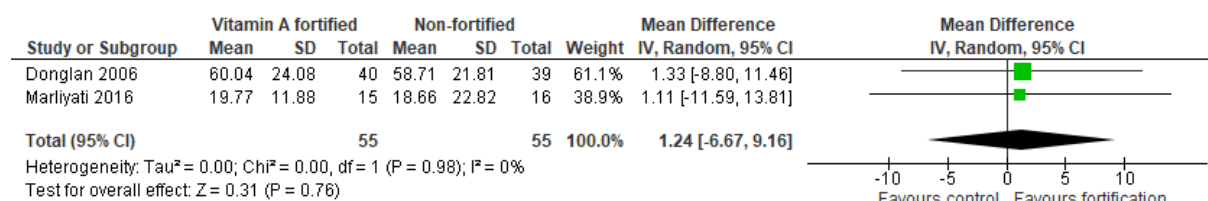

### Analysis 1.21. Vitamin A fortified versus non-fortified oils and fats. Outcome: IgA levels (µmol/L)

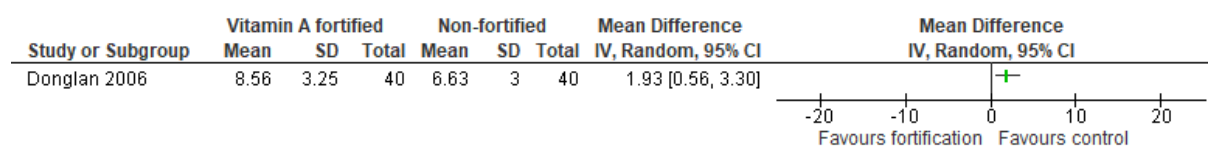

### Analysis 1.22. Vitamin A fortified versus non-fortified oils and fats. Outcome: IgM levels (µmol/L)

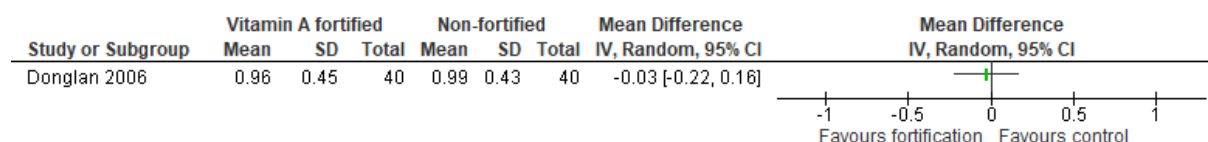

### Analysis 1.23. Vitamin A fortified versus non-fortified oils and fats. Outcome: Type-2 diabetes mellitus

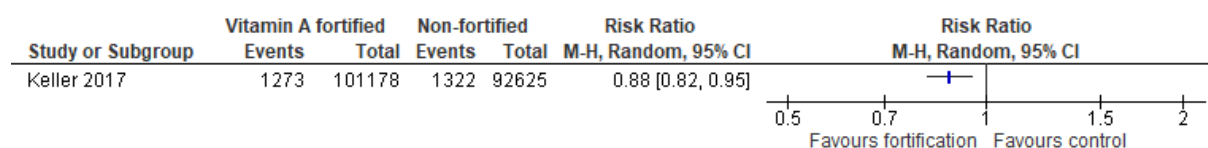

Supplement: s1 [file s1]
