# Supplementary material for: Benefits and Harms of Edible Vegetable Oils and Fats Fortified with Vitamins A and D as a Public Health Intervention in the General Population: A Systematic Review of Interventions
Source: MDPI journal article supplement (doi:10.3390/nu15245135), 2023-12-18

## Supplementary file S6: Effect of Vitamin D fortified versus non-fortified oils and fats

### Analysis 2.1. Vitamin D fortified versus non-fortified oils and fats. Outcome: Serum 25-hydroxy vitamin D

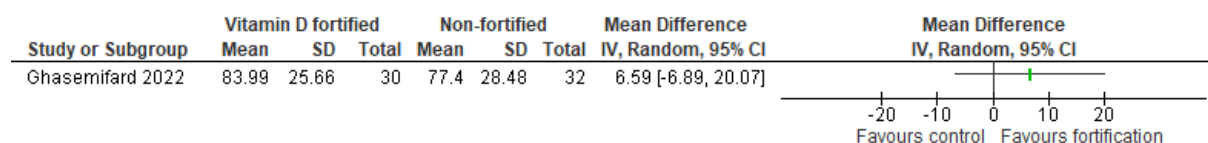

### Analysis 2.2. Vitamin D fortified versus non-fortified oils and fats. Outcome: Serum 25-hydroxy vitamin D by vitamin D intake in the population

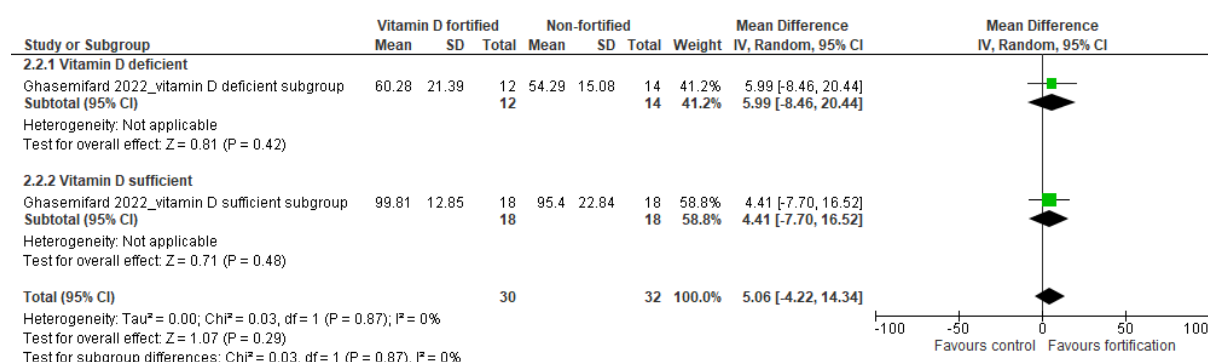

### Analysis 2.3. Vitamin D fortified versus non-fortified oils and fats. Outcome: Parathyroid hormone (PTH), pmol/L

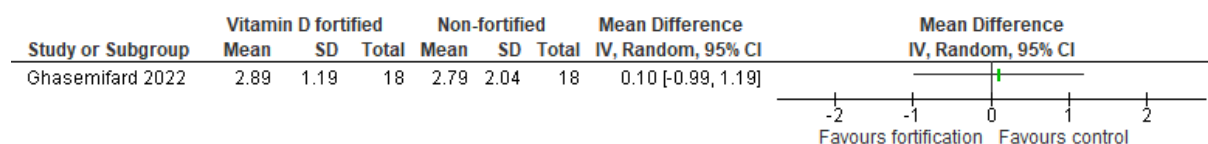

### Analysis 2.4. Vitamin D fortified versus non-fortified oils and fats. Outcome: Vitamin D intake, mcg

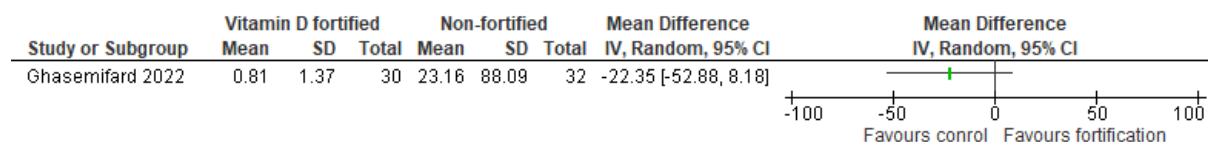

**Analysis 2.5. Vitamin D fortified versus non-fortified oils and fats. Outcome: Bone alkaline phosphatase (B-ALP), IU/L**

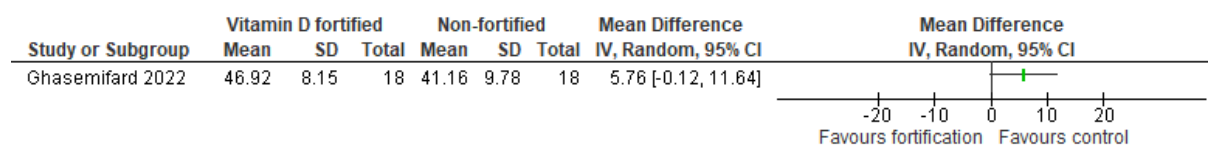

**Analysis 2.6. Vitamin D fortified versus non-fortified oils and fats. Outcome: Total cholesterol (mmol/L)**

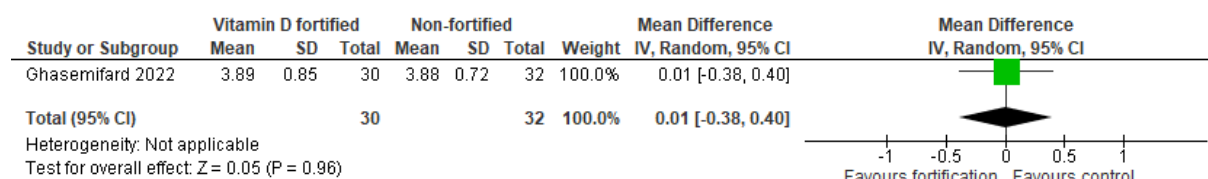

**Analysis 2.7. Vitamin D fortified versus non-fortified oils and fats. Outcome: LDL cholesterol (mmol/L)**

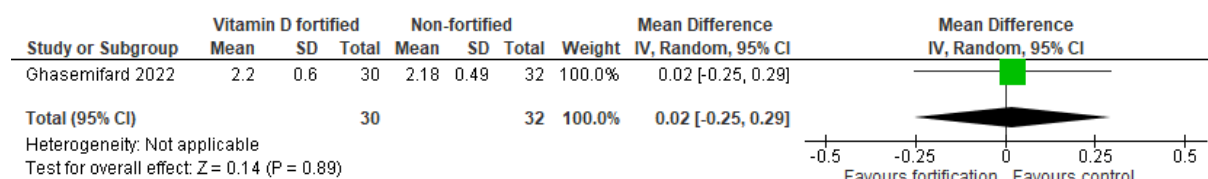

**Analysis 2.8. Vitamin D fortified versus non-fortified oils and fats. Outcome: HDL cholesterol (mmol/L)**

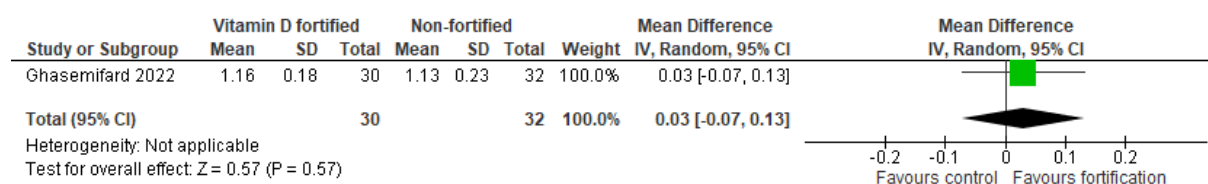

**Analysis 2.9. Vitamin D fortified versus non-fortified oils and fats. Outcome: Triglyceride (mmol/L)**

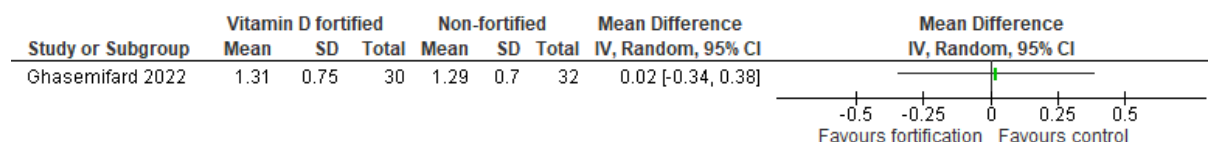

### Analysis 2.10. Vitamin D fortified versus non-fortified oils and fats. Outcome: Gestational hypertension

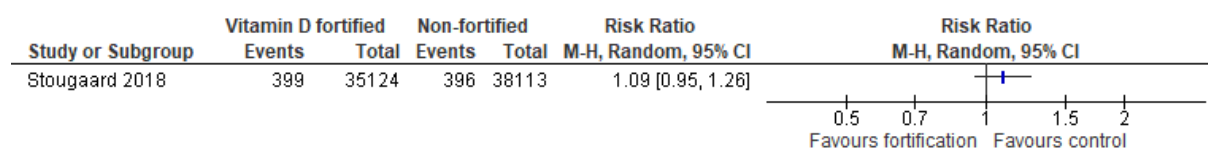

### Analysis 2.11. Vitamin D fortified versus non-fortified oils and fats. Outcome: Preeclampsia

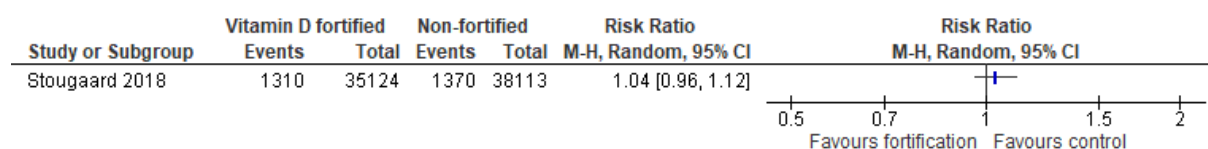

### Analysis 2.12. Vitamin D fortified versus non-fortified oils and fats. Outcome: Eclampsia

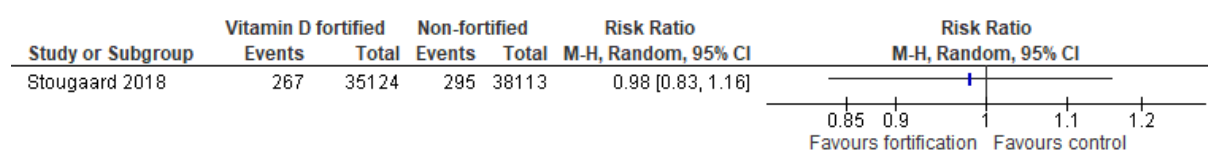

### Analysis 2.13. Vitamin D fortified versus non-fortified oils and fats. Outcome: Gestational diabetes mellitus

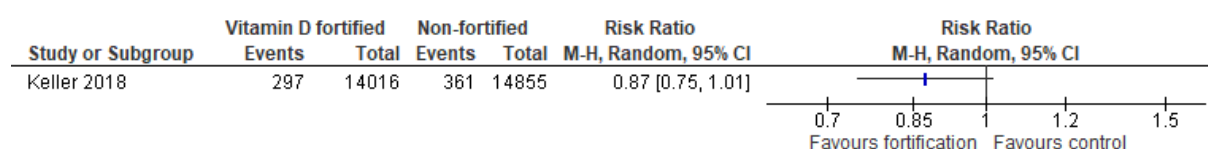

### Analysis 2.14. Vitamin D fortified versus non-fortified oils and fats. Outcome: Childhood asthma

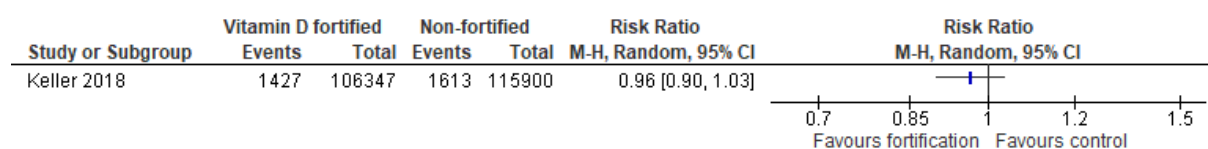

### Analysis 2.15. Vitamin D fortified versus non-fortified oils and fats. Outcome: Type-1 diabetes mellitus

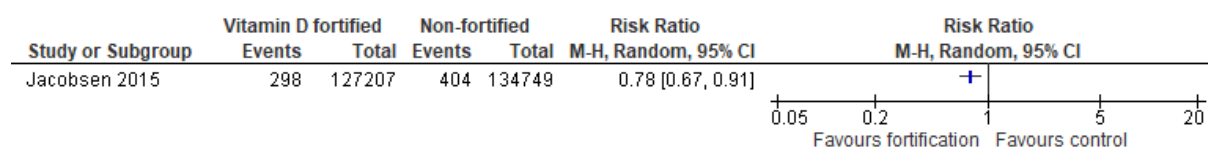

### Analysis 2.16. Vitamin D fortified versus non-fortified oils and fats. Outcome: Fractures

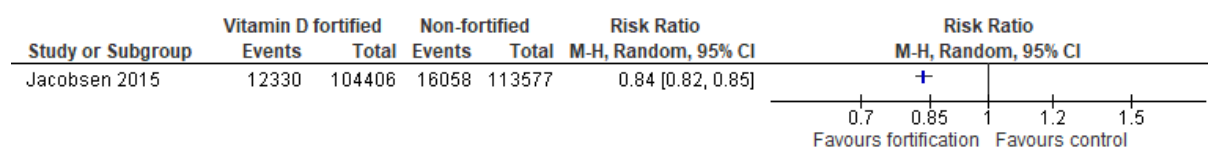

### Analysis 2.17. Vitamin D fortified versus non-fortified oils and fats. Outcome: Birth weight (g)

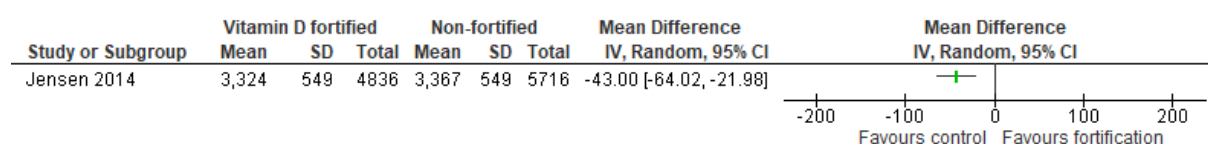

### Analysis 2.18. Vitamin D fortified versus non-fortified oils and fats. Outcome: Low birth weight (<2500 g)

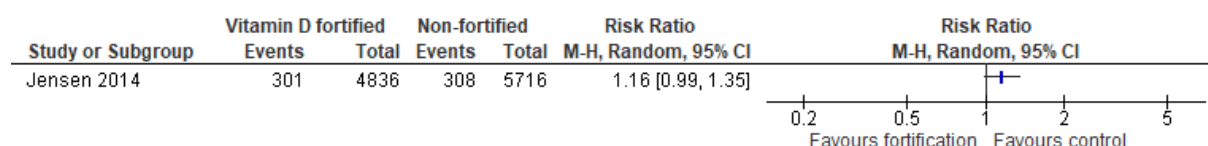

### Analysis 2.19. Vitamin D fortified versus non-fortified oils and fats. Outcome: High birth weight (>4000 g)

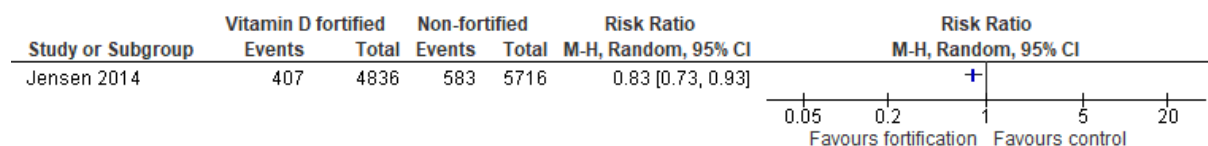

### Analysis 2.20. Vitamin D fortified versus non-fortified oils and fats. Outcome: BMI (at 7 years)

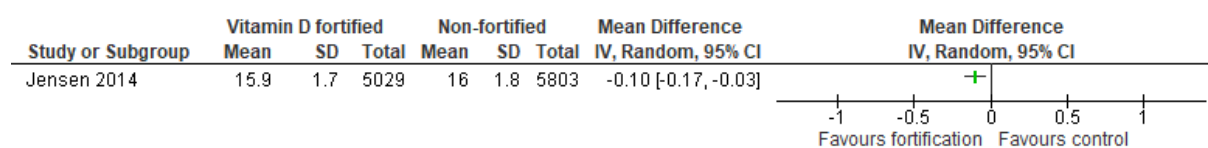

### Analysis 2.21. Vitamin D fortified versus non-fortified oils and fats. Outcome: BMI z-scores

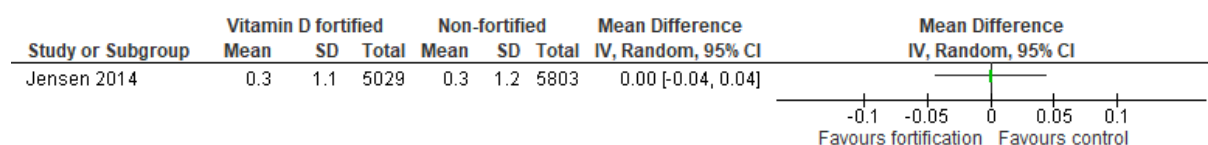

### Analysis 2.22. Vitamin D fortified versus non-fortified oils and fats. Outcome: Overweight

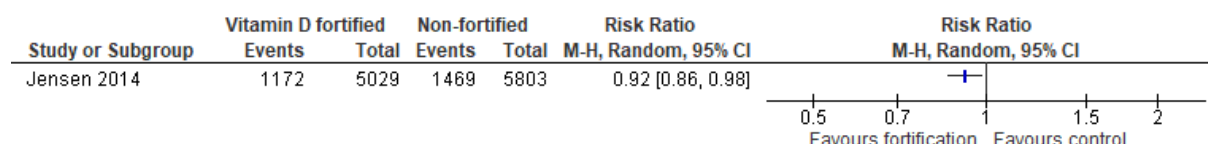

### Analysis 2.23. Vitamin D fortified versus non-fortified oils and fats. Outcome: Obesity

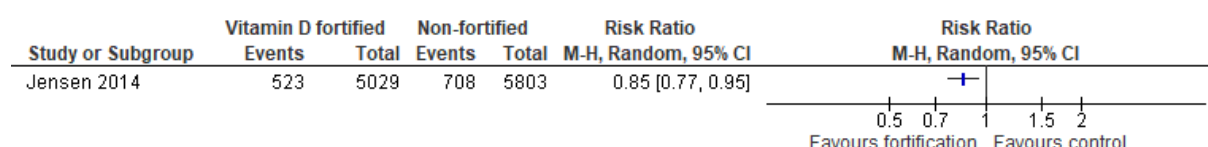

### Analysis 2.24. Vitamin D fortified versus non-fortified oils and fats. Outcome: IBD incidence

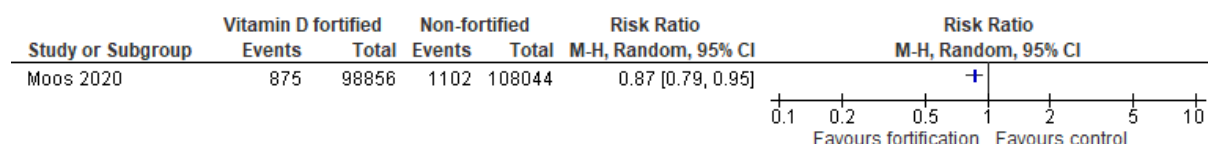

### Analysis 2.25. Vitamin D fortified versus non-fortified oils and fats. Outcome: Coeliac disease

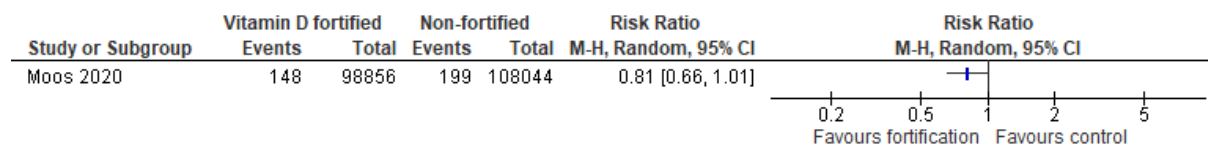

### Analysis 2.26. Vitamin D fortified versus non-fortified oils and fats. Outcome: Energy intake (kcal)

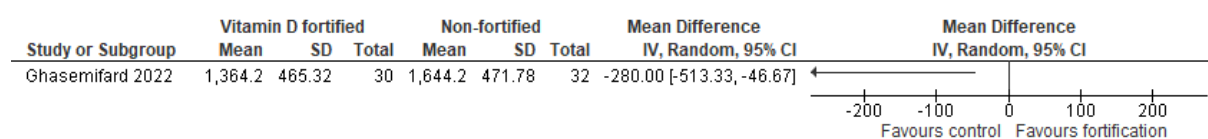

Supplement: s1 [file s1]
