# Supplementary material for: Benefits and Harms of Edible Vegetable Oils and Fats Fortified with Vitamins A and D as a Public Health Intervention in the General Population: A Systematic Review of Interventions
Source: MDPI journal article supplement (doi:10.3390/nu15245135), 2023-12-18

## Supplementary file S4: Risk of bias assessment

**Figure 1. Risk of bias graph: review authors' judgements about each risk of bias item presented as percentages across all included randomised trials.**

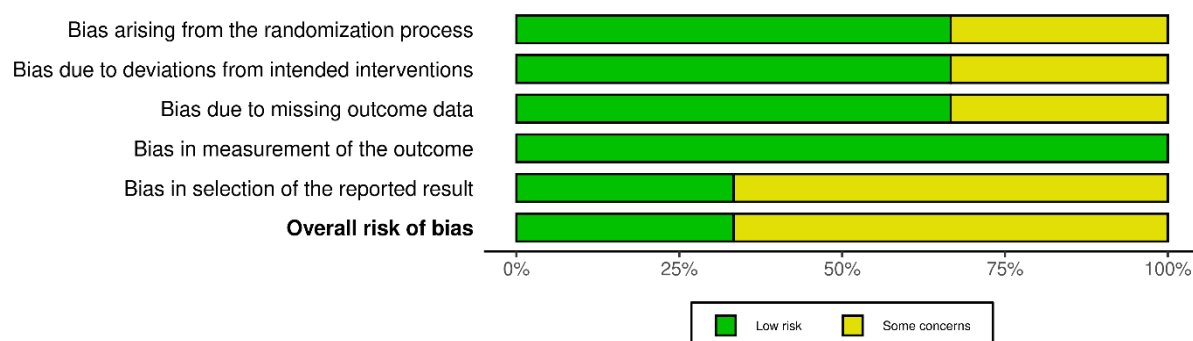

**Figure 2. Risk of bias summary: review authors' judgements about each risk of bias item for each included randomised trial**

|       |                  | Risk of bias domains                                                                |                                                                                     |                                                                                     |                                                                                      |                                                                                       |                                                                                       |
|-------|------------------|-------------------------------------------------------------------------------------|-------------------------------------------------------------------------------------|-------------------------------------------------------------------------------------|--------------------------------------------------------------------------------------|---------------------------------------------------------------------------------------|---------------------------------------------------------------------------------------|
|       |                  | D1                                                                                  | D2                                                                                  | D3                                                                                  | D4                                                                                   | D5                                                                                    | Overall                                                                               |
| Study | Candelaria 2005  |  |  |  |  |  |  |
|       | Atalhi 2020/2011 |  |  |  |  |  |  |
|       | Ghasemifard 2020 |  |  |  |  |  |  |

Domains:

D1: Bias arising from the randomization process.  
D2: Bias due to deviations from intended intervention.  
D3: Bias due to missing outcome data.  
D4: Bias in measurement of the outcome.  
D5: Bias in selection of the reported result.

Judgement

 Some concerns  
 Low

**Figure 3. Risk of bias graph: review authors' judgements about each risk of bias item presented as percentages across all included non-randomised trials.**

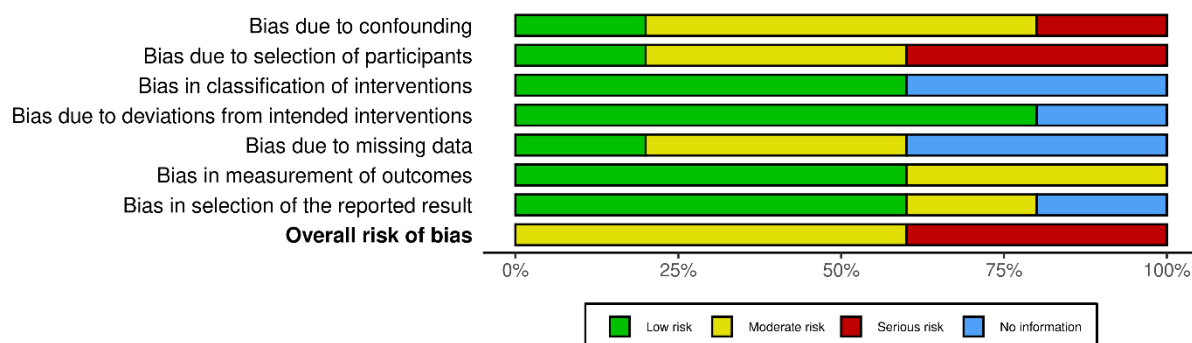

**Figure 4. Risk of bias summary: review authors' judgements about each risk of bias item for each included non-randomised trial**

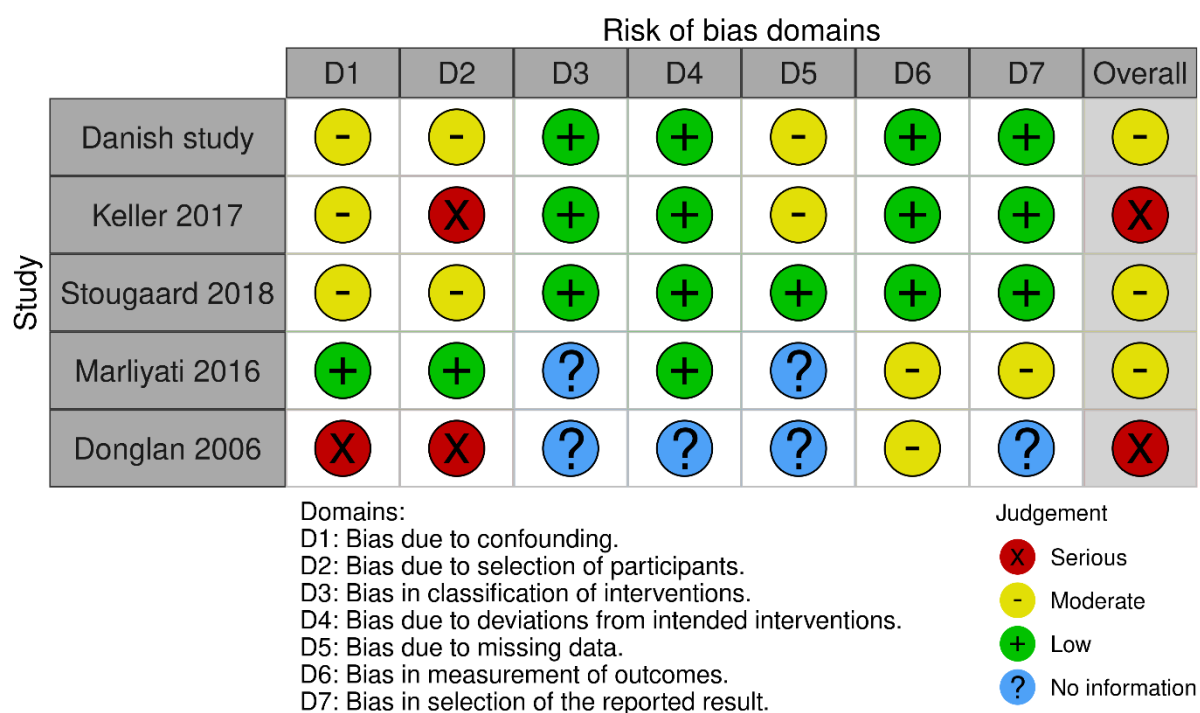

Supplement: s1 [file s1]
