# Supplementary material for: Benefits and Harms of Edible Vegetable Oils and Fats Fortified with Vitamins A and D as a Public Health Intervention in the General Population: A Systematic Review of Interventions
Source: MDPI journal article supplement (doi:10.3390/nu15245135), 2023-12-18
Supplement: s1 [file s1]

## Supplementary file S7: Grade assessment

**Table 1. GRADE Assessment – Vitamin D fortification vs. no fortification with vitamin D (Evidence profile table for the primary outcomes)**

| Certainty assessment |              |              |               |              |             |                      | № of patients                    |                                     | Effect            |                   | Certainty | Importance |
|----------------------|--------------|--------------|---------------|--------------|-------------|----------------------|----------------------------------|-------------------------------------|-------------------|-------------------|-----------|------------|
| № of studies         | Study design | Risk of bias | Inconsistency | Indirectness | Imprecision | Other considerations | vitamin D fortified oils or fats | same oils or fats without vitamin D | Relative (95% CI) | Absolute (95% CI) |           |            |

**Serum 25-hydroxy vitamin D concentrations (µmol/L) (follow-up: 12 weeks)**

|                |                   |             |                          |             |                           |      |    |    |   |                                                                                           |             |          |
|----------------|-------------------|-------------|--------------------------|-------------|---------------------------|------|----|----|---|-------------------------------------------------------------------------------------------|-------------|----------|
| 1 <sup>1</sup> | randomised trials | not serious | not serious <sup>a</sup> | not serious | very serious <sup>b</sup> | none | 30 | 32 | - | MD <b>6.59</b><br><b>nmol/L</b><br><b>higher</b><br>(6.89<br>lower to<br>20.07<br>higher) | ⊕⊕○○<br>Low | CRITICAL |
|----------------|-------------------|-------------|--------------------------|-------------|---------------------------|------|----|----|---|-------------------------------------------------------------------------------------------|-------------|----------|

**Vitamin D deficiency - not measured**

[illegible]

**Osteomalacia in elderly - not measured**

[illegible]

**Nutritional rickets - not measured**

[illegible]

**Adverse effects (hypervitaminosis, hypercalcemia, kidney stones) - not measured**

| Certainty assessment |              |              |               |              |             |                      | № of patients                    |                                     | Effect            |                   | Certainty | Importance |
|----------------------|--------------|--------------|---------------|--------------|-------------|----------------------|----------------------------------|-------------------------------------|-------------------|-------------------|-----------|------------|
| № of studies         | Study design | Risk of bias | Inconsistency | Indirectness | Imprecision | Other considerations | vitamin D fortified oils or fats | same oils or fats without vitamin D | Relative (95% CI) | Absolute (95% CI) |           |            |
| -                    | -            | -            | -             | -            | -           | -                    | -                                | -                                   | -                 | -                 | -         | CRITICAL   |

**Morbidity - not measured**

|   |   |   |   |   |   |   |   |   |   |   |   |          |
|---|---|---|---|---|---|---|---|---|---|---|---|----------|
| - | - | - | - | - | - | - | - | - | - | - | - | CRITICAL |
|---|---|---|---|---|---|---|---|---|---|---|---|----------|

**Mortality - not measured**

|   |   |   |   |   |   |   |   |   |   |   |   |          |
|---|---|---|---|---|---|---|---|---|---|---|---|----------|
| - | - | - | - | - | - | - | - | - | - | - | - | CRITICAL |
|---|---|---|---|---|---|---|---|---|---|---|---|----------|

**CI:** confidence interval; **MD:** mean difference; **RR:** risk ratio

### *Explanations*

a. This is a single study so inconsistency cannot be judged.

b. Downgraded by two levels for imprecision since results are derived from one study, where total sample size was very low (n<100).

### *References*

1.Ghasemifard, N., Hassanzadeh-Rostami, Z., Abbasi, A., Naghavi, A. M., Faghih, S.. Effects of vitamin D-fortified oil intake versus vitamin D supplementation on vitamin D status and bone turnover factors: a double blind randomized clinical trial. Clinical nutrition ESPEN; 2022.

**Table 2. GRADE Assessment – Vitamin A fortification vs. no fortification with vitamin A – Secondary outcomes**

| Certainty assessment |              |              |               |              |             |                      | № of patients                    |                                     | Effect            |                   | Certainty | Importance |
|----------------------|--------------|--------------|---------------|--------------|-------------|----------------------|----------------------------------|-------------------------------------|-------------------|-------------------|-----------|------------|
| № of studies         | Study design | Risk of bias | Inconsistency | Indirectness | Imprecision | Other considerations | vitamin A fortified oils or fats | same oils or fats without vitamin A | Relative (95% CI) | Absolute (95% CI) |           |            |

**Dietary vitamin A intake (µg RE/day) - Randomized Studies (follow-up: 6 months)**

|                |                   |                      |                          |             |                      |      |     |     |   |                                                                  |             |           |
|----------------|-------------------|----------------------|--------------------------|-------------|----------------------|------|-----|-----|---|------------------------------------------------------------------|-------------|-----------|
| 1 <sup>1</sup> | randomised trials | serious <sup>b</sup> | not serious <sup>e</sup> | not serious | serious <sup>c</sup> | none | 268 | 144 | - | MD <b>15.7 µg RE/day lower</b><br>(105.82 lower to 74.42 higher) | ⊕⊕○○<br>Low | IMPORTANT |
|----------------|-------------------|----------------------|--------------------------|-------------|----------------------|------|-----|-----|---|------------------------------------------------------------------|-------------|-----------|

**Dietary vitamin A intake (µg RE/day) - Non-randomized Studies (follow-up: 2 months)**

|                |                            |                      |                          |             |                           |      |    |    |   |                                                                      |                  |           |
|----------------|----------------------------|----------------------|--------------------------|-------------|---------------------------|------|----|----|---|----------------------------------------------------------------------|------------------|-----------|
| 1 <sup>3</sup> | controlled clinical trials | serious <sup>b</sup> | not serious <sup>e</sup> | not serious | very serious <sup>d</sup> | none | 15 | 16 | - | MD <b>240.6 µg RE/day higher</b><br>(175.07 higher to 306.13 higher) | ⊕○○○<br>Very low | IMPORTANT |
|----------------|----------------------------|----------------------|--------------------------|-------------|---------------------------|------|----|----|---|----------------------------------------------------------------------|------------------|-----------|

**Liver stores of vitamin A - not measured**

|   |   |   |   |   |   |   |   |   |   |   |   |           |
|---|---|---|---|---|---|---|---|---|---|---|---|-----------|
| - | - | - | - | - | - | - | - | - | - | - | - | IMPORTANT |
|---|---|---|---|---|---|---|---|---|---|---|---|-----------|

**Retinol in breast milk (µmol/L) (follow-up: 6 months)**

| Certainty assessment |                   |                      |                          |              |                           |                      | № of patients                    |                                     | Effect            |                                                           | Certainty        | Importance |
|----------------------|-------------------|----------------------|--------------------------|--------------|---------------------------|----------------------|----------------------------------|-------------------------------------|-------------------|-----------------------------------------------------------|------------------|------------|
| № of studies         | Study design      | Risk of bias         | Inconsistency            | Indirectness | Imprecision               | Other considerations | vitamin A fortified oils or fats | same oils or fats without vitamin A | Relative (95% CI) | Absolute (95% CI)                                         |                  |            |
| 1 <sup>2</sup>       | randomised trials | serious <sup>b</sup> | not serious <sup>e</sup> | not serious  | very serious <sup>d</sup> | none                 | 37                               | 26                                  | -                 | MD <b>0.79 µmol/L higher</b> (0.72 higher to 0.86 higher) | ⊕○○○<br>Very low | IMPORTANT  |

**Mothers with low concentrations of retinol in breast milk (<1.05 µmol/L) (follow-up: 6 months)**

|                |                   |                      |                          |             |                           |      |             |                |                               |                                                          |                  |           |
|----------------|-------------------|----------------------|--------------------------|-------------|---------------------------|------|-------------|----------------|-------------------------------|----------------------------------------------------------|------------------|-----------|
| 1 <sup>2</sup> | randomised trials | serious <sup>b</sup> | not serious <sup>e</sup> | not serious | very serious <sup>d</sup> | none | 2/62 (3.2%) | 39/39 (100.0%) | <b>RR 0.04</b> (0.01 to 0.14) | <b>960 fewer per 1 000</b> (from 990 fewer to 860 fewer) | ⊕○○○<br>Very low | IMPORTANT |
|----------------|-------------------|----------------------|--------------------------|-------------|---------------------------|------|-------------|----------------|-------------------------------|----------------------------------------------------------|------------------|-----------|

**Prevalence of biochemical vitamin A deficiency (measured by Modified Relative Dose Response test; MRDR) - not measured**

|   |   |   |   |   |   |   |   |   |   |   |   |           |
|---|---|---|---|---|---|---|---|---|---|---|---|-----------|
| - | - | - | - | - | - | - | - | - | - | - | - | IMPORTANT |
|---|---|---|---|---|---|---|---|---|---|---|---|-----------|

**Retinol-binding protein level - not measured**

|   |   |   |   |   |   |   |   |   |   |   |   |           |
|---|---|---|---|---|---|---|---|---|---|---|---|-----------|
| - | - | - | - | - | - | - | - | - | - | - | - | IMPORTANT |
|---|---|---|---|---|---|---|---|---|---|---|---|-----------|

**Beta-carotene levels - not measured**

|   |   |   |   |   |   |   |   |   |   |   |   |           |
|---|---|---|---|---|---|---|---|---|---|---|---|-----------|
| - | - | - | - | - | - | - | - | - | - | - | - | IMPORTANT |
|---|---|---|---|---|---|---|---|---|---|---|---|-----------|

**Serum ferritin - not measured**

| Certainty assessment |              |              |               |              |             |                      | № of patients                    |                                     | Effect            |                   | Certainty | Importance |
|----------------------|--------------|--------------|---------------|--------------|-------------|----------------------|----------------------------------|-------------------------------------|-------------------|-------------------|-----------|------------|
| № of studies         | Study design | Risk of bias | Inconsistency | Indirectness | Imprecision | Other considerations | vitamin A fortified oils or fats | same oils or fats without vitamin A | Relative (95% CI) | Absolute (95% CI) |           |            |
| -                    | -            | -            | -             | -            | -           | -                    | -                                | -                                   | -                 | -                 | -         | IMPORTANT  |

#### Anaemia - not measured

|   |   |   |   |   |   |   |   |   |   |   |   |           |
|---|---|---|---|---|---|---|---|---|---|---|---|-----------|
| - | - | - | - | - | - | - | - | - | - | - | - | IMPORTANT |
|---|---|---|---|---|---|---|---|---|---|---|---|-----------|

#### BMI - Non-randomized Studies (follow-up: 2 months)

|                |                   |                      |                          |             |                           |      |    |    |   |                                                          |                  |  |
|----------------|-------------------|----------------------|--------------------------|-------------|---------------------------|------|----|----|---|----------------------------------------------------------|------------------|--|
| 1 <sup>3</sup> | randomised trials | serious <sup>b</sup> | not serious <sup>e</sup> | not serious | very serious <sup>d</sup> | none | 15 | 16 | - | MD <b>0.69 kg/m2 higher</b> (0.09 higher to 1.29 higher) | ⊕○○○<br>Very low |  |
|----------------|-------------------|----------------------|--------------------------|-------------|---------------------------|------|----|----|---|----------------------------------------------------------|------------------|--|

#### Weight-for-height (in z-scores) (follow-up: 6 months)

|                |                   |                      |                          |             |                      |      |     |     |   |                                                           |             |  |
|----------------|-------------------|----------------------|--------------------------|-------------|----------------------|------|-----|-----|---|-----------------------------------------------------------|-------------|--|
| 1 <sup>1</sup> | randomised trials | serious <sup>b</sup> | not serious <sup>e</sup> | not serious | serious <sup>f</sup> | none | 268 | 145 | - | MD <b>0.02 z-scores lower</b> (0.21 lower to 0.17 higher) | ⊕⊕○○<br>Low |  |
|----------------|-------------------|----------------------|--------------------------|-------------|----------------------|------|-----|-----|---|-----------------------------------------------------------|-------------|--|

#### IgG levels (µmol/L) - Non-randomized Studies (follow-up: range 2 to 5 months)



| Certainty assessment |              |              |               |              |             |                      | № of patients                    |                                     | Effect            |                   | Certainty | Importance |
|----------------------|--------------|--------------|---------------|--------------|-------------|----------------------|----------------------------------|-------------------------------------|-------------------|-------------------|-----------|------------|
| № of studies         | Study design | Risk of bias | Inconsistency | Indirectness | Imprecision | Other considerations | vitamin A fortified oils or fats | same oils or fats without vitamin A | Relative (95% CI) | Absolute (95% CI) |           |            |

#### Type-2 diabetes mellitus

|                |                       |                                |             |             |             |      |                    |                   |                                  |                                                       |                  |  |
|----------------|-----------------------|--------------------------------|-------------|-------------|-------------|------|--------------------|-------------------|----------------------------------|-------------------------------------------------------|------------------|--|
| 1 <sup>5</sup> | observational studies | extremely serious <sup>i</sup> | not serious | not serious | not serious | none | 1273/101178 (1.3%) | 1322/92625 (1.4%) | <b>RR 0.88</b><br>(0.82 to 0.95) | <b>2 fewer per 1 000</b><br>(from 3 fewer to 1 fewer) | ⊕○○○<br>Very low |  |
|----------------|-----------------------|--------------------------------|-------------|-------------|-------------|------|--------------------|-------------------|----------------------------------|-------------------------------------------------------|------------------|--|

**CI:** confidence interval; **MD:** mean difference; **RR:** risk ratio

#### Explanations

- Downgraded by one level for RoB since 1 out of 2 included studies was rated with a high RoB, and none of the included studies was rated with a low RoB
- Downgraded by one level for RoB since the included study was rated with some concerns for RoB
- Downgraded by one level for imprecision. There was only one study included, but the total sample size was larger than 400 (n=412)
- Downgraded by two levels for imprecision since results are derived from one study, where total sample size was very low (n<100).
- This is a single study so inconsistency cannot be judged.
- Downgraded by one level for imprecision. There was only one study included, but the total sample size was larger than 400 (n=413)
- Downgraded by one level for imprecision since results are derived from two small studies with a low total sample size (n=110).
- Downgraded by two levels for RoB since the included study was rated with high RoB
- Downgraded by three levels for RoB since the study included was a birth cohort study rated with serious concerns for RoB with the ROBINS-I tool

#### References

1. Candelaria, L. V., Magsadia, C. R., Velasco, R. E., Pedro, M. R., Barba, C. V., Tanchoco, C. C.. The effect of vitamin A-fortified coconut cooking oil on the serum retinol concentration of Filipino children 4-7 years old. Asia Pacific journal of clinical nutrition; 2005.

2. Atalhi, N., El Hamdouchi, A., Barkat, A., Elkari, K., Hamrani, A., El Mzibri, M., Haskell, M. J., Mokhtar, N., Aguenou, H.. Combined consumption of a single high-dose vitamin A supplement with provision of vitamin A fortified oil to households maintains adequate milk retinol concentrations for 6 months in lactating Moroccan women. *Physiologie appliquee, nutrition et metabolisme [Applied physiology, nutrition, and metabolism]*; 2020.
3. Marliyati, S. A., Martianto, D., Andarwulan, N., Fauzi, S.. Efficacy of non-branded cooking oil fortified with carotene from RPO on blood retinol and IgG of children aged 7-9 years. *Pakistan journal of nutrition*; 2016.
4. Donglan, Wang, Qingmin, Xiao, Yan, Hong, Shutian, L., I., Weiqiang, Chen, Yingyong, Cheng. Effects of vitamin A-fortified edible oil on improving the immune function of children. *Acta Nutrimenta Sinica*; 2006.
5. Keller, A., Angquist, L., Jacobsen, R., Vaag, A., Heitmann, B. L.. A retrospective analysis of a societal experiment among the Danish population suggests that exposure to extra doses of vitamin A during fetal development may lower type 2 diabetes mellitus (T2DM) risk later in life. *British journal of nutrition*; 2017.



**Table 3. GRADE Assessment – Vitamin D fortification vs. no fortification with vitamin D – Secondary outcomes**

| Certainty assessment |              |              |               |              |             |                      | № of patients                    |                                     | Effect            |                   | Certainty | Importance |
|----------------------|--------------|--------------|---------------|--------------|-------------|----------------------|----------------------------------|-------------------------------------|-------------------|-------------------|-----------|------------|
| № of studies         | Study design | Risk of bias | Inconsistency | Indirectness | Imprecision | Other considerations | vitamin D fortified oils or fats | same oils or fats without vitamin D | Relative (95% CI) | Absolute (95% CI) |           |            |

**Intake of dietary vitamin D (follow-up: 12 weeks; assessed with: mcg/day)**

|                |                   |             |                          |             |                           |      |    |    |   |                                                        |             |           |
|----------------|-------------------|-------------|--------------------------|-------------|---------------------------|------|----|----|---|--------------------------------------------------------|-------------|-----------|
| 1 <sup>1</sup> | randomised trials | not serious | not serious <sup>a</sup> | not serious | very serious <sup>b</sup> | none | 30 | 32 | - | MD <b>22.35 mcg lower</b> (52.88 lower to 8.18 higher) | ⊕⊕○○<br>Low | IMPORTANT |
|----------------|-------------------|-------------|--------------------------|-------------|---------------------------|------|----|----|---|--------------------------------------------------------|-------------|-----------|

**Serum parathyroid hormone (PTH) (follow-up: 12 weeks; assessed with: pmol/L)**

|                |                   |             |                          |             |                           |      |    |    |   |                                                         |             |           |
|----------------|-------------------|-------------|--------------------------|-------------|---------------------------|------|----|----|---|---------------------------------------------------------|-------------|-----------|
| 1 <sup>1</sup> | randomised trials | not serious | not serious <sup>a</sup> | not serious | very serious <sup>b</sup> | none | 18 | 18 | - | MD <b>0.1 pmol/L higher</b> (0.99 lower to 1.99 higher) | ⊕⊕○○<br>Low | IMPORTANT |
|----------------|-------------------|-------------|--------------------------|-------------|---------------------------|------|----|----|---|---------------------------------------------------------|-------------|-----------|

**Bone alkaline phosphatase (B-ALP) (follow-up: 12 weeks; assessed with: IU/L)**

| Certainty assessment |                   |              |                          |              |                           |                      | № of patients                    |                                     | Effect            |                                                         | Certainty   | Importance |
|----------------------|-------------------|--------------|--------------------------|--------------|---------------------------|----------------------|----------------------------------|-------------------------------------|-------------------|---------------------------------------------------------|-------------|------------|
| № of studies         | Study design      | Risk of bias | Inconsistency            | Indirectness | Imprecision               | Other considerations | vitamin D fortified oils or fats | same oils or fats without vitamin D | Relative (95% CI) | Absolute (95% CI)                                       |             |            |
| 1 <sup>1</sup>       | randomised trials | not serious  | not serious <sup>a</sup> | not serious  | very serious <sup>b</sup> | none                 | 18                               | 18                                  | -                 | MD <b>5.76 IU/L higher</b> (0.12 lower to 11.64 higher) | ⊕⊕○○<br>Low | IMPORTANT  |

#### Incidence of gestational diabetes mellitus

|                |                       |                           |                          |             |                      |      |                  |                  |                               |                                                    |                  |           |
|----------------|-----------------------|---------------------------|--------------------------|-------------|----------------------|------|------------------|------------------|-------------------------------|----------------------------------------------------|------------------|-----------|
| 1 <sup>2</sup> | observational studies | very serious <sup>c</sup> | not serious <sup>a</sup> | not serious | serious <sup>d</sup> | none | 297/14016 (2.1%) | 361/14855 (2.4%) | <b>RR 0.87</b> (0.75 to 1.01) | <b>3 fewer per 1 000</b> (from 6 fewer to 0 fewer) | ⊕○○○<br>Very low | IMPORTANT |
|----------------|-----------------------|---------------------------|--------------------------|-------------|----------------------|------|------------------|------------------|-------------------------------|----------------------------------------------------|------------------|-----------|

#### Weight gain during pregnancy - not measured

|   |   |   |   |   |   |   |   |   |   |   |   |           |
|---|---|---|---|---|---|---|---|---|---|---|---|-----------|
| - | - | - | - | - | - | - | - | - | - | - | - | IMPORTANT |
|---|---|---|---|---|---|---|---|---|---|---|---|-----------|

#### Preeclampsia

|                |                       |                           |                          |             |                      |      |                   |                   |                               |                                                  |                  |           |
|----------------|-----------------------|---------------------------|--------------------------|-------------|----------------------|------|-------------------|-------------------|-------------------------------|--------------------------------------------------|------------------|-----------|
| 1 <sup>3</sup> | observational studies | very serious <sup>c</sup> | not serious <sup>a</sup> | not serious | serious <sup>d</sup> | none | 1310/35124 (3.7%) | 1370/38113 (3.6%) | <b>RR 1.04</b> (0.96 to 1.12) | <b>1 more per 1 000</b> (from 1 fewer to 4 more) | ⊕○○○<br>Very low | IMPORTANT |
|----------------|-----------------------|---------------------------|--------------------------|-------------|----------------------|------|-------------------|-------------------|-------------------------------|--------------------------------------------------|------------------|-----------|

#### Gestational hypertension

| Certainty assessment |                       |                           |                          |              |                      |                      | № of patients                    |                                     | Effect                           |                                                     | Certainty        | Importance |
|----------------------|-----------------------|---------------------------|--------------------------|--------------|----------------------|----------------------|----------------------------------|-------------------------------------|----------------------------------|-----------------------------------------------------|------------------|------------|
| № of studies         | Study design          | Risk of bias              | Inconsistency            | Indirectness | Imprecision          | Other considerations | vitamin D fortified oils or fats | same oils or fats without vitamin D | Relative (95% CI)                | Absolute (95% CI)                                   |                  |            |
| 1 <sup>3</sup>       | observational studies | very serious <sup>c</sup> | not serious <sup>a</sup> | not serious  | serious <sup>d</sup> | none                 | 399/35124 (1.1%)                 | 396/38113 (1.0%)                    | <b>RR 1.09</b><br>(0.95 to 1.26) | <b>1 more per 1 000</b><br>(from 1 fewer to 3 more) | ⊕○○○<br>Very low |            |

#### Eclampsia

|                |                       |                           |                          |             |                      |      |                  |                  |                                  |                                                      |                  |  |
|----------------|-----------------------|---------------------------|--------------------------|-------------|----------------------|------|------------------|------------------|----------------------------------|------------------------------------------------------|------------------|--|
| 1 <sup>3</sup> | observational studies | very serious <sup>c</sup> | not serious <sup>a</sup> | not serious | serious <sup>d</sup> | none | 267/35124 (0.8%) | 396/38113 (1.0%) | <b>RR 0.98</b><br>(0.83 to 1.16) | <b>0 fewer per 1 000</b><br>(from 2 fewer to 2 more) | ⊕○○○<br>Very low |  |
|----------------|-----------------------|---------------------------|--------------------------|-------------|----------------------|------|------------------|------------------|----------------------------------|------------------------------------------------------|------------------|--|

#### Preterm birth - not measured

|   |   |   |   |   |   |   |   |   |   |   |   |           |
|---|---|---|---|---|---|---|---|---|---|---|---|-----------|
| - | - | - | - | - | - | - | - | - | - | - | - | IMPORTANT |
|---|---|---|---|---|---|---|---|---|---|---|---|-----------|

#### Low birth weight (<2500 g)

|                |                       |                           |                          |             |                      |      |                 |                 |                                  |                                                      |                  |           |
|----------------|-----------------------|---------------------------|--------------------------|-------------|----------------------|------|-----------------|-----------------|----------------------------------|------------------------------------------------------|------------------|-----------|
| 1 <sup>4</sup> | observational studies | very serious <sup>c</sup> | not serious <sup>a</sup> | not serious | serious <sup>d</sup> | none | 301/4836 (6.2%) | 308/5716 (5.4%) | <b>RR 1.16</b><br>(0.99 to 1.35) | <b>9 more per 1 000</b><br>(from 1 fewer to 19 more) | ⊕○○○<br>Very low | IMPORTANT |
|----------------|-----------------------|---------------------------|--------------------------|-------------|----------------------|------|-----------------|-----------------|----------------------------------|------------------------------------------------------|------------------|-----------|

#### Postpartum depression - not measured

|   |   |   |   |   |   |   |   |   |   |   |   |           |
|---|---|---|---|---|---|---|---|---|---|---|---|-----------|
| - | - | - | - | - | - | - | - | - | - | - | - | IMPORTANT |
|---|---|---|---|---|---|---|---|---|---|---|---|-----------|

#### Postpartum haemorrhage - not measured

| Certainty assessment |              |              |               |              |             |                      | № of patients                    |                                     | Effect            |                   | Certainty | Importance |
|----------------------|--------------|--------------|---------------|--------------|-------------|----------------------|----------------------------------|-------------------------------------|-------------------|-------------------|-----------|------------|
| № of studies         | Study design | Risk of bias | Inconsistency | Indirectness | Imprecision | Other considerations | vitamin D fortified oils or fats | same oils or fats without vitamin D | Relative (95% CI) | Absolute (95% CI) |           |            |
| -                    | -            | -            | -             | -            | -           | -                    | -                                | -                                   | -                 | -                 | -         | IMPORTANT  |

#### Breastmilk vitamin D content of lactating women - not measured

|   |   |   |   |   |   |   |   |   |   |   |   |           |
|---|---|---|---|---|---|---|---|---|---|---|---|-----------|
| - | - | - | - | - | - | - | - | - | - | - | - | IMPORTANT |
|---|---|---|---|---|---|---|---|---|---|---|---|-----------|

#### BMI

|                |                       |                           |                          |             |             |      |      |      |   |                                                                 |             |           |
|----------------|-----------------------|---------------------------|--------------------------|-------------|-------------|------|------|------|---|-----------------------------------------------------------------|-------------|-----------|
| 1 <sup>5</sup> | observational studies | very serious <sup>c</sup> | not serious <sup>a</sup> | not serious | not serious | none | 5029 | 5803 | - | MD <b>0.1 kg/m<sup>2</sup> lower</b> (0.17 lower to 0.03 lower) | ⊕⊕○○<br>Low | IMPORTANT |
|----------------|-----------------------|---------------------------|--------------------------|-------------|-------------|------|------|------|---|-----------------------------------------------------------------|-------------|-----------|

#### Overweight

|                |                       |                           |                          |             |             |      |                   |                   |                               |                                                      |             |           |
|----------------|-----------------------|---------------------------|--------------------------|-------------|-------------|------|-------------------|-------------------|-------------------------------|------------------------------------------------------|-------------|-----------|
| 1 <sup>5</sup> | observational studies | very serious <sup>c</sup> | not serious <sup>a</sup> | not serious | not serious | none | 1172/5029 (23.3%) | 1469/5803 (25.3%) | <b>RR 0.92</b> (0.86 to 0.98) | <b>20 fewer per 1 000</b> (from 35 fewer to 5 fewer) | ⊕⊕○○<br>Low | IMPORTANT |
|----------------|-----------------------|---------------------------|--------------------------|-------------|-------------|------|-------------------|-------------------|-------------------------------|------------------------------------------------------|-------------|-----------|

#### Obesity

|                |                       |                           |                          |             |             |      |                  |                  |                               |                                                      |             |           |
|----------------|-----------------------|---------------------------|--------------------------|-------------|-------------|------|------------------|------------------|-------------------------------|------------------------------------------------------|-------------|-----------|
| 1 <sup>5</sup> | observational studies | very serious <sup>c</sup> | not serious <sup>a</sup> | not serious | not serious | none | 523/5029 (10.4%) | 708/5803 (12.2%) | <b>RR 0.85</b> (0.77 to 0.95) | <b>18 fewer per 1 000</b> (from 28 fewer to 6 fewer) | ⊕⊕○○<br>Low | IMPORTANT |
|----------------|-----------------------|---------------------------|--------------------------|-------------|-------------|------|------------------|------------------|-------------------------------|------------------------------------------------------|-------------|-----------|

| Certainty assessment |              |              |               |              |             |                      | № of patients                    |                                     | Effect            |                   | Certainty | Importance |
|----------------------|--------------|--------------|---------------|--------------|-------------|----------------------|----------------------------------|-------------------------------------|-------------------|-------------------|-----------|------------|
| № of studies         | Study design | Risk of bias | Inconsistency | Indirectness | Imprecision | Other considerations | vitamin D fortified oils or fats | same oils or fats without vitamin D | Relative (95% CI) | Absolute (95% CI) |           |            |

### Type-1 diabetes mellitus

|                |                       |                           |                          |             |             |      |                      |                      |                                  |                                                       |             |           |
|----------------|-----------------------|---------------------------|--------------------------|-------------|-------------|------|----------------------|----------------------|----------------------------------|-------------------------------------------------------|-------------|-----------|
| 1 <sup>6</sup> | observational studies | very serious <sup>c</sup> | not serious <sup>a</sup> | not serious | not serious | none | 298/127207<br>(0.2%) | 404/134749<br>(0.3%) | <b>RR 0.78</b><br>(0.67 to 0.91) | <b>1 fewer per 1 000</b><br>(from 1 fewer to 0 fewer) | ⊕⊕○○<br>Low | IMPORTANT |
|----------------|-----------------------|---------------------------|--------------------------|-------------|-------------|------|----------------------|----------------------|----------------------------------|-------------------------------------------------------|-------------|-----------|

**Type-2 diabetes mellitus - not measured**

[illegible]

## Fracture events

|                |                       |                           |                          |             |             |      |                         |                         |                                  |                                                          |             |           |
|----------------|-----------------------|---------------------------|--------------------------|-------------|-------------|------|-------------------------|-------------------------|----------------------------------|----------------------------------------------------------|-------------|-----------|
| 1 <sup>7</sup> | observational studies | very serious <sup>c</sup> | not serious <sup>a</sup> | not serious | not serious | none | 12330/104406<br>(11.8%) | 16058/113577<br>(14.1%) | <b>RR 0.84</b><br>(0.82 to 0.85) | <b>23 fewer per 1 000</b><br>(from 25 fewer to 21 fewer) | ⊕⊕○○<br>Low | IMPORTANT |
|----------------|-----------------------|---------------------------|--------------------------|-------------|-------------|------|-------------------------|-------------------------|----------------------------------|----------------------------------------------------------|-------------|-----------|

## Childhood asthma

|                |                       |             |                          |             |             |      |                       |                       |                                  |                                                       |             |           |
|----------------|-----------------------|-------------|--------------------------|-------------|-------------|------|-----------------------|-----------------------|----------------------------------|-------------------------------------------------------|-------------|-----------|
| 1 <sup>8</sup> | observational studies | not serious | not serious <sup>a</sup> | not serious | not serious | none | 1427/106347<br>(1.3%) | 1613/115900<br>(1.4%) | <b>RR 0.96</b><br>(0.90 to 1.03) | <b>1 fewer per 1 000</b><br>(from 1 fewer to 0 fewer) | ⊕⊕○○<br>Low | IMPORTANT |
|----------------|-----------------------|-------------|--------------------------|-------------|-------------|------|-----------------------|-----------------------|----------------------------------|-------------------------------------------------------|-------------|-----------|

**Hypertension - not measured**

[illegible]

| Certainty assessment |              |              |               |              |             |                      | № of patients                    |                                     | Effect            |                   | Certainty | Importance |
|----------------------|--------------|--------------|---------------|--------------|-------------|----------------------|----------------------------------|-------------------------------------|-------------------|-------------------|-----------|------------|
| № of studies         | Study design | Risk of bias | Inconsistency | Indirectness | Imprecision | Other considerations | vitamin D fortified oils or fats | same oils or fats without vitamin D | Relative (95% CI) | Absolute (95% CI) |           |            |

#### Cardiovascular disease - not measured

|   |   |   |   |   |   |   |   |   |   |   |   |           |
|---|---|---|---|---|---|---|---|---|---|---|---|-----------|
| - | - | - | - | - | - | - | - | - | - | - | - | IMPORTANT |
|---|---|---|---|---|---|---|---|---|---|---|---|-----------|

#### Respiratory infections - not measured

|   |   |   |   |   |   |   |   |   |   |   |   |           |
|---|---|---|---|---|---|---|---|---|---|---|---|-----------|
| - | - | - | - | - | - | - | - | - | - | - | - | IMPORTANT |
|---|---|---|---|---|---|---|---|---|---|---|---|-----------|

#### Menopause onset - not measured

|   |   |   |   |   |   |   |   |   |   |   |   |           |
|---|---|---|---|---|---|---|---|---|---|---|---|-----------|
| - | - | - | - | - | - | - | - | - | - | - | - | IMPORTANT |
|---|---|---|---|---|---|---|---|---|---|---|---|-----------|

#### IBD

|                |                       |                           |                          |             |             |      |                  |                    |                                  |                                                       |             |  |
|----------------|-----------------------|---------------------------|--------------------------|-------------|-------------|------|------------------|--------------------|----------------------------------|-------------------------------------------------------|-------------|--|
| 1 <sup>9</sup> | observational studies | very serious <sup>c</sup> | not serious <sup>a</sup> | not serious | not serious | none | 875/98856 (0.9%) | 1102/108044 (1.0%) | <b>RR 0.87</b><br>(0.79 to 0.95) | <b>1 fewer per 1 000</b><br>(from 2 fewer to 1 fewer) | ⊕⊕○○<br>Low |  |
|----------------|-----------------------|---------------------------|--------------------------|-------------|-------------|------|------------------|--------------------|----------------------------------|-------------------------------------------------------|-------------|--|

#### Total cholesterol (follow-up: 12 weeks; assessed with: mmol/L)

|                 |                   |             |                          |             |                           |      |    |    |   |                                                            |             |  |
|-----------------|-------------------|-------------|--------------------------|-------------|---------------------------|------|----|----|---|------------------------------------------------------------|-------------|--|
| 1 <sup>10</sup> | randomised trials | not serious | not serious <sup>a</sup> | not serious | very serious <sup>b</sup> | none | 30 | 32 | - | <b>MD 0.01 mmol/L higher</b><br>(0.38 lower to 0.4 higher) | ⊕⊕○○<br>Low |  |
|-----------------|-------------------|-------------|--------------------------|-------------|---------------------------|------|----|----|---|------------------------------------------------------------|-------------|--|

| Certainty assessment |              |              |               |              |             |                      | № of patients                    |                                     | Effect            |                   | Certainty | Importance |
|----------------------|--------------|--------------|---------------|--------------|-------------|----------------------|----------------------------------|-------------------------------------|-------------------|-------------------|-----------|------------|
| № of studies         | Study design | Risk of bias | Inconsistency | Indirectness | Imprecision | Other considerations | vitamin D fortified oils or fats | same oils or fats without vitamin D | Relative (95% CI) | Absolute (95% CI) |           |            |

**LDL Cholesterol (follow-up: 12 weeks; assessed with: mmol/L)**

|                 |                   |             |                          |             |                           |      |    |    |   |                                                          |             |  |
|-----------------|-------------------|-------------|--------------------------|-------------|---------------------------|------|----|----|---|----------------------------------------------------------|-------------|--|
| 1 <sup>10</sup> | randomised trials | not serious | not serious <sup>a</sup> | not serious | very serious <sup>b</sup> | none | 30 | 32 | - | MD <b>0.02 mmol/L higher</b> (0.25 lower to 0.29 higher) | ⊕⊕○○<br>Low |  |
|-----------------|-------------------|-------------|--------------------------|-------------|---------------------------|------|----|----|---|----------------------------------------------------------|-------------|--|

**HDL cholesterol (follow-up: 12 weeks; assessed with: mmol/L)**

|                 |                   |             |                          |             |                           |      |    |    |   |                                                          |             |  |
|-----------------|-------------------|-------------|--------------------------|-------------|---------------------------|------|----|----|---|----------------------------------------------------------|-------------|--|
| 1 <sup>10</sup> | randomised trials | not serious | not serious <sup>a</sup> | not serious | very serious <sup>b</sup> | none | 30 | 32 | - | MD <b>0.03 mmol/L higher</b> (0.07 lower to 0.13 higher) | ⊕⊕○○<br>Low |  |
|-----------------|-------------------|-------------|--------------------------|-------------|---------------------------|------|----|----|---|----------------------------------------------------------|-------------|--|

**Triglyceride (follow-up: 12 weeks; assessed with: mmol/L)**

|                 |                   |             |                          |             |                           |      |    |    |   |                                                          |             |  |
|-----------------|-------------------|-------------|--------------------------|-------------|---------------------------|------|----|----|---|----------------------------------------------------------|-------------|--|
| 1 <sup>10</sup> | randomised trials | not serious | not serious <sup>a</sup> | not serious | very serious <sup>b</sup> | none | 30 | 32 | - | MD <b>0.02 mmol/L higher</b> (0.34 lower to 0.38 higher) | ⊕⊕○○<br>Low |  |
|-----------------|-------------------|-------------|--------------------------|-------------|---------------------------|------|----|----|---|----------------------------------------------------------|-------------|--|

**Energy intake (kcal) (follow-up: 12 weeks)**

| Certainty assessment |                   |              |                          |              |                           |                      | № of patients                    |                                     | Effect            |                                                        | Certainty   | Importance |
|----------------------|-------------------|--------------|--------------------------|--------------|---------------------------|----------------------|----------------------------------|-------------------------------------|-------------------|--------------------------------------------------------|-------------|------------|
| № of studies         | Study design      | Risk of bias | Inconsistency            | Indirectness | Imprecision               | Other considerations | vitamin D fortified oils or fats | same oils or fats without vitamin D | Relative (95% CI) | Absolute (95% CI)                                      |             |            |
| 1 <sup>1</sup>       | randomised trials | not serious  | not serious <sup>a</sup> | not serious  | very serious <sup>b</sup> | none                 | 31                               | 30                                  | -                 | MD <b>280 kcal lower</b> (513.33 lower to 46.67 lower) | ⊕⊕○○<br>Low |            |

#### High birth weight (>4000 g)

|                |                       |                           |                          |             |             |      |                 |                  |                               |                                                      |             |  |
|----------------|-----------------------|---------------------------|--------------------------|-------------|-------------|------|-----------------|------------------|-------------------------------|------------------------------------------------------|-------------|--|
| 1 <sup>4</sup> | observational studies | very serious <sup>c</sup> | not serious <sup>a</sup> | not serious | not serious | none | 407/4836 (8.4%) | 583/5716 (10.2%) | <b>RR 0.83</b> (0.73 to 0.93) | <b>17 fewer per 1 000</b> (from 28 fewer to 7 fewer) | ⊕⊕○○<br>Low |  |
|----------------|-----------------------|---------------------------|--------------------------|-------------|-------------|------|-----------------|------------------|-------------------------------|------------------------------------------------------|-------------|--|

#### Celiac disease

|                 |                       |                           |                          |             |                      |      |                  |                   |                               |                                                    |                  |  |
|-----------------|-----------------------|---------------------------|--------------------------|-------------|----------------------|------|------------------|-------------------|-------------------------------|----------------------------------------------------|------------------|--|
| 1 <sup>11</sup> | observational studies | very serious <sup>c</sup> | not serious <sup>a</sup> | not serious | serious <sup>d</sup> | none | 148/98856 (0.1%) | 199/108044 (0.2%) | <b>RR 0.81</b> (0.66 to 1.01) | <b>0 fewer per 1 000</b> (from 1 fewer to 0 fewer) | ⊕○○○<br>Very low |  |
|-----------------|-----------------------|---------------------------|--------------------------|-------------|----------------------|------|------------------|-------------------|-------------------------------|----------------------------------------------------|------------------|--|

**CI:** confidence interval; **MD:** mean difference; **RR:** risk ratio

#### Explanations

a. This is a single study so inconsistency cannot be judged.

b. Downgraded by two levels for imprecision since results are derived from one study, where total sample size was very low (n<100).

c. Downgraded by two levels for RoB since the study included was a birth cohort study rated with some concerns for RoB with the ROBINS-I tool



d. Downgraded by one level for imprecision since results are derived from one study, and the confidence interval was crossing the line of no effect

### *References*

- 1.Ghasemifard, N., Hassanzadeh-Rostami, Z., Abbasi, A., Naghavi, A. M., Faghih, S.. Effects of vitamin D-fortified oil intake versus vitamin D supplementation on vitamin D status and bone turnover factors: a double blind randomized clinical trial. *Clinical nutrition ESPEN*; 2022.
- 2.Keller, A., Stougard, M., Frederiksen, P., Thorsteinsdottir, F., Vaag, A., Damm, P., Jacobsen, R., B, L.,Heitmann. In utero exposure to extra vitamin D from food fortification and the risk of subsequent development of gestational diabetes: the D-tect study. *Nutrition journal*; 2018.
- 3.Stougaard, M., Damm, P., Frederiksen, P., Jacobsen, R., Heitmann, B. L.. Extra vitamin D from fortification and the risk of preeclampsia: The D-tect Study. *PLoS ONE* [Electronic Resource]; 2018.
- 4.Jensen, C. B., Berentzen, T. L., Gamborg, M., Sorensen, T. I., Heitmann, B. L.. Does prenatal exposure to vitamin D-fortified margarine and milk alter birth weight? A societal experiment. *British journal of nutrition*; 2014.
- 5.Jensen, C. B., Gamborg, M., Berentzen, T. L., Sørensen, T. I. A., Heitmann, B. L.. Prenatal exposure to vitamin-D from fortified margarine and milk and body size at age 7 years. *European journal of clinical nutrition*; 2015.
- 6.Jacobsen, R., Hyponen, E., Sorensen, T. I., Vaag, A. A., Heitmann, B. L.. Gestational and Early Infancy Exposure to Margarine Fortified with Vitamin D through a National Danish Programme and the Risk of Type 1 Diabetes: The D-Tect Study. *PLoS ONE* [Electronic Resource]; 2015.
- 7.Handel, M. N., Frederiksen, P., Osmond, C., Cooper, C., Abrahamsen, B., Heitmann, B. L.. Prenatal exposure to vitamin D from fortified margarine and risk of fractures in late childhood: period and cohort results from 222 000 subjects in the D-tect observational study. *British journal of nutrition*; 2017.
- 8.Thorsteinsdottir, F., Maslova, E., Jacobsen, R., Frederiksen, P., Keller, A., Backer, V., Heitmann, B. L.. Exposure to Vitamin D Fortification Policy in Prenatal Life and the Risk of Childhood Asthma: Results From the D-Tect Study. *Nutrients*; 2019.
- 9.Duus, K. S., Moos, C., Frederiksen, P., Andersen, V., Heitmann, B. L.. Prenatal and Early Life Exposure to the Danish Mandatory Vitamin D Fortification Policy Might Prevent Inflammatory Bowel Disease Later in Life: A Societal Experiment. *Nutrients*; 2021.
- 10.Ghasemifard, N., Nasimi, N., Hassanzadeh-Rostami, Z., Abbasi, A., Faghih, S.. Effects of vitamin D fortified canola oil on vitamin D and lipid profiles in healthy adults: A double-blind randomized trial. *Iranian Journal of Nutrition Sciences and Food Technology*; 2020.
- 11.Moos, C., Duus, K. S., Frederiksen, P., Heitmann, B. L., Andersen, V.. Exposure to the Danish Mandatory Vitamin D Fortification Policy in Prenatal Life and the Risk of Developing Coeliac Disease-The Importance of Season: A Semi Ecological Study. *Nutrients*; 2020.
